# Supplementary material for: Parental knowledge, attitudes and beliefs on fever: a cross-sectional study in Ireland
Source: PubMed Central journal article supplement — BMJ Open. 2017 Jul 9;7(7):e015684. doi: 10.1136/bmjopen-2016-015684 (PMC5541503; doi:10.1136/bmjopen-2016-015684), 2017-07-09
Supplement: bmjopen-2016-015684.draft_revisions.pdf [file bmjopen-2016-015684.draft_revisions.pdf]

# BMJ Open

## Parental knowledge, attitudes and beliefs on fever; opportunities for public health initiatives – a questionnaire study

|                                 |                                                                                                                                                                                                                                                                                                                                                                                                                                                                                                                                                                                                                                                                                                                                                                                                                                                                                                                                                                                                                                                                                    |
|---------------------------------|------------------------------------------------------------------------------------------------------------------------------------------------------------------------------------------------------------------------------------------------------------------------------------------------------------------------------------------------------------------------------------------------------------------------------------------------------------------------------------------------------------------------------------------------------------------------------------------------------------------------------------------------------------------------------------------------------------------------------------------------------------------------------------------------------------------------------------------------------------------------------------------------------------------------------------------------------------------------------------------------------------------------------------------------------------------------------------|
| Journal:                        | <i>BMJ Open</i>                                                                                                                                                                                                                                                                                                                                                                                                                                                                                                                                                                                                                                                                                                                                                                                                                                                                                                                                                                                                                                                                    |
| Manuscript ID                   | bmjopen-2016-015684                                                                                                                                                                                                                                                                                                                                                                                                                                                                                                                                                                                                                                                                                                                                                                                                                                                                                                                                                                                                                                                                |
| Article Type:                   | Research                                                                                                                                                                                                                                                                                                                                                                                                                                                                                                                                                                                                                                                                                                                                                                                                                                                                                                                                                                                                                                                                           |
| Date Submitted by the Author:   | 04-Jan-2017                                                                                                                                                                                                                                                                                                                                                                                                                                                                                                                                                                                                                                                                                                                                                                                                                                                                                                                                                                                                                                                                        |
| Complete List of Authors:       | Kelly, Maria; University College Cork National University of Ireland, School of Pharmacy<br>Sahm, Laura; University College Cork, School of Pharmacy; Mercy University Hospital, Pharmacy Department<br>Shiely, Frances; University College Cork, Epidemiology and Public Health<br>O'Sullivan, Ronan; National Children's Research Centre, Paediatric Emergency Care Research Unit (PERU); University College Cork National University of Ireland, School of Medicine<br>de Bont, Eefje; Maastricht University, research institute CAPHRI, Family Medicine<br>McGillicuddy, Aoife; University College Cork National University of Ireland, School of Pharmacy<br>Herlihy, Roisin; University College Cork National University of Ireland, School of Pharmacy<br>Dahly, Darren; University College Cork National University of Ireland, Department of Epidemiology and Public Health, University College Cork, Cork, Ireland<br>McCarthy, Suzanne; University College Cork National University of Ireland, School of Pharmacy; Cork University Hospital Group, Pharmacy Department |
| <b>Primary Subject Heading</b>: | Public health                                                                                                                                                                                                                                                                                                                                                                                                                                                                                                                                                                                                                                                                                                                                                                                                                                                                                                                                                                                                                                                                      |
| Secondary Subject Heading:      | Paediatrics, Health services research, Health policy, General practice / Family practice                                                                                                                                                                                                                                                                                                                                                                                                                                                                                                                                                                                                                                                                                                                                                                                                                                                                                                                                                                                           |
| Keywords:                       | Community child health < PAEDIATRICS, Fever, Temperature, Parents, Attitude, Knowledge                                                                                                                                                                                                                                                                                                                                                                                                                                                                                                                                                                                                                                                                                                                                                                                                                                                                                                                                                                                             |
|                                 |                                                                                                                                                                                                                                                                                                                                                                                                                                                                                                                                                                                                                                                                                                                                                                                                                                                                                                                                                                                                                                                                                    |

SCHOLARONE™  
Manuscripts

1  
2  
3  
4 **Parental knowledge, attitudes and beliefs on fever; opportunities for public health**  
5 **initiatives – a questionnaire study**  
6  
7  
8  
9

10 **Address correspondence to:** Maria Kelly, Pharmaceutical Care Research Group, School of  
11 Pharmacy, University College Cork, Ireland, 113223823@umail.ucc.ie, 0035321 490 1690  
12

13  
14 Kelly M<sup>1,2</sup>, Sahm L J<sup>1,3</sup>, Shiely F<sup>2,4</sup>, O’Sullivan R<sup>5,6</sup>, de Bont E G<sup>7</sup>, Mc Gillicuddy A<sup>1</sup>,  
15 Herlihy R<sup>1</sup>, Dahly D<sup>2,4</sup> and McCarthy S<sup>1,8</sup>  
16

17 <sup>1</sup>Pharmaceutical Care Research Group, School of Pharmacy, University College Cork,  
18 Ireland; <sup>2</sup>HRB Clinical Research Facility, Mercy University Hospital, Cork, Ireland;  
19 <sup>3</sup>Department of Pharmacy, Mercy University Hospital, Cork, Ireland; <sup>4</sup>Department of  
20 Epidemiology and Public Health, University College Cork, Cork, Ireland; <sup>5</sup>School of  
21 Medicine, University College Cork, Cork, Ireland; <sup>6</sup>National Children’s Research Centre,  
22 Dublin 12, Ireland; <sup>7</sup>Department of Family Medicine, CAPHRI School for Public Health and  
23 Primary Care, Maastricht University, PO Box 616, 6200 MD, Maastricht, The Netherlands,  
24 <sup>8</sup>Cork University Hospital, Cork, Ireland.  
25  
26  
27

28 **Running Title:** Parental knowledge of fever; a questionnaire study  
29  
30

31 **Word count:** 3496  
32  
33  
34  
35  
36  
37  
38  
39  
40  
41  
42  
43  
44  
45  
46  
47  
48  
49  
50  
51  
52  
53  
54  
55  
56  
57  
58  
59  
60

## Abstract

### Objectives

Fever is both common and mostly benign in young children, yet concerning for parents. The aim of this study was to describe parental knowledge, attitudes and beliefs regarding fever in children aged  $\leq$  five years of age.

### Design

A cross-sectional study using a previously validated questionnaire. Analysis was conducted using SPSS version 22.0 (SPSS, Inc., Chicago IL) and R version 3.3.1.

### Setting

Purposively selected primary schools (n=8) in Cork, Ireland using a paper-based questionnaire. Data were collected from a cross-sectional internet-based questionnaire with a convenience sample of parents via webpages (n=10) previously identified in an interview study.

### Participants

Parents with at least one child aged  $\leq$  five years were invited to participate in the study.

### Main outcome measures

Parental knowledge, attitudes and beliefs when managing fever in children.

### Results

1104 parents contributed to this research (121 parents from schools and 983 parents through an online questionnaire). Almost two-thirds of parents (63.1%) identified temperatures at which they define fever that were either below or above the recognised definition of temperature ( $38^{\circ}\text{C}$ ). Nearly two of every three parents (64.6%) alternate between two fever-reducing medications when managing a child's fever. Amongst parents, years of parenting experience, age, sex, educational status, or marital status did not predict being able to correctly identify a fever, neither did they predict if the parent alternated between fever-reducing medications.

### Conclusions

Parental knowledge of fever and fever management was found to be deficient which concurs with existing literature. Parental experience and other socio-demographic factors were generally not helpful in identifying knowledgeable parents. Resources to help parents when managing a febrile illness need to be introduced to help all parents provide effective care.

**Key Words:** child, fever, temperature, parents, knowledge, attitude

## Article Summary

### Strengths and Limitations

- A large number of parents were recruited for this study which is one of the major strengths of this study.
- Beliefs and opinions were captured in a non-clinical setting which may portray more realistic attitudes and concerns than those captured at the point of care or in acute care settings.
- The questionnaire used in this study was previously validated.
- A limitation of the study is that we cannot estimate response rate from the web-based study.
- Participants were mainly mothers or had third level education which limits generalisability of findings.

### Introduction

Fever, defined as a regulated rise in temperature, is common in childhood,[1-4] however fever episodes are rarely a symptom of serious illness.[1 5 6]

Fever is commonly defined as a temperature of 38<sup>o</sup>C or above.[7 8] Fever on its own does not require treatment,[9] and guidelines recommend that antipyretics should only be used when the child is also distressed or in pain.[4] However, research suggests that parents often misuse antipyretics by over- or under-dosing,[10 11] or by routinely alternating between antipyretics when managing a fever,[12] despite guidance to the contrary.[4]

Studies examining parents' attitudes and beliefs around fever are limited.[13] The majority of published studies were conducted in secondary care where perceptions may be biased as children may be acutely unwell, placing stress on the parents and possibly influencing responses.[13] Consequently, the National Institute of Health and Care Excellence (NICE) has suggested that studies examining home antipyretic use be done. Furthermore, the NICE Guideline Development Group has called for studies of: parental help-seeking behaviour; triggers for presentation to a healthcare professional; triggers for the decision to give an antipyretic; and triggers for the decision to change from one antipyretic to another.[6] To help address these gaps, we surveyed parental knowledge, attitudes and beliefs around childhood fever and febrile illness.

## Methods

Cross-sectional data for this study were collected from parents with at least one child aged five years of age or younger, and were recruited from one of two sources: purposively selected primary schools (n=8) in Cork, Ireland and via the internet (websites and webpages n=10). The schools were selected to maximise sample variation, and included urban and rural settings; large and small schools; and schools that were, and were not designated as delivering education to children and young people who are experiencing, or are at risk of experiencing, educational disadvantage. The websites and webpages used to recruit parents for the internet questionnaire were selected from previous qualitative work with parents.[14] A review of existing literature suggested a sample size of  $\geq 600$  parents would be adequate to ensure generalisability of responses.[7 12 15-23] Data collection in the schools took place over one week in December 2015, while responses from the internet questionnaire were obtained in January 2016. There were no incentives for participation. School based parents provided written informed consent, whereas consent was implied from online participation.

The questionnaire administered in this study was developed and used in previous research.[7 24-26] The questionnaire was modified to reflect custom and practice in Ireland and piloted with a sample of five parents. It consisted of 38 questions with sub-themes. Response options, including yes/no, agree/disagree, and Likert scales were used. The questionnaire assessed parental knowledge, help-seeking behaviours and expectations, needs for additional resources, fever management practices, use of pharmaceutical products, and concerns, attitudes and beliefs.

Respondents' answers were entered into a Microsoft Excel (2013) data file. Available cases were analysed. Paper-based responses were entered by RH (a researcher not involved in the care of participants). A random sample of 20% of paper-based responses were checked for accuracy by MK. Where data were missing, available cases were analysed. Data were analysed using SPSS version 22.0 (SPSS, Inc., Chicago IL) and R version 3.3.1.[27] Categorical variables were described by the count and proportion in each category. Continuous variables were described by their means and standard deviations (SD), or by their medians and inter-quartile ranges (IQR), depending on whether they were normally distributed or not.

Crude associations between categorical variables were assessed using Pearson's Chi-square test. P values <0.05 were considered to be statistically significant, given a null hypothesis of independence. Multivariable logistic regression was used to estimate covariate adjusted associations, reported as odds ratios (ORs) and 95% confidence intervals (CIs), between key socio-demographic predictors (years of parental experience, respondent age, sex, educational level, and marital/partner status) and each the following dependent variables: whether the parent identified the correct temperature indicative of a fever, and whether they reported alternating fever-reducing medications.

### Participant involvement

A previous qualitative study on this topic conducted by the research team,<sup>(9)</sup> found that parents identified fever as a priority when caring for young children, however parents perceived that they lacked knowledge. Following on from this study, a small number of parents were asked to participate in the design of this study. Parents were not involved in recruiting other parents. Study participants who indicated that they would like to receive a copy of the final report were provided with the report.

## Results

### Parents' characteristics

A total of 121 parents recruited from schools completed the paper-based questionnaire (response rate 42%), while 983 parents contributed using the online questionnaire. Overall, 1104 parents contributed to this research.

Of those parents who indicated their gender (n=817), 95.5% were female. The age of parents ranged from 20 to 55 years of age, with a mean age of 35.3 years (n=805, SD 4.8).

Although the majority of parents were white Irish (91.8%, n=746), parents representing 34 nationalities participated in the study. Parents (n=817) indicated that they had between 1 and

7 children; the median number of children was 2 (IQR 2). Additional demographic information is listed in Table 1

Table 1. Additional demographic information

|                                          |                   |               |
|------------------------------------------|-------------------|---------------|
| Education level (n=816)                  | Primary level     | 0.2% (n=1)    |
|                                          | Secondary level   | 11.6% (n=95)  |
|                                          | Third level       | 88.2% (n=720) |
| Marital status/living situation (n=1029) | Married           | 79.3% (n=816) |
|                                          | Co-habiting       | 15.6% (n=161) |
|                                          | Single            | 3.3% (n=34)   |
|                                          | Divorced          | 1% (n=10)     |
|                                          | Widowed           | 0.6% (n=6)    |
|                                          | Civil partnership | 0.2% (n=2)    |

## Knowledge

Parents (n=1104) indicated that they considered temperatures between 36°C and over 40°C indicative of fever. Almost two-thirds of parents (63.1%) identified temperatures at which they define fever that were either below (44%) or above (19.1%) the recognised definition of temperature (38°C).[7 8] Logistic regression analysis showed no apparent associations between reporting the correct definition of fever temperature and years of parenting experience or key socio-demographic factors (Supplemental Table 1).

Parents illustrated a good level of knowledge regarding infections and medication. Most parents (94.9% n=971) believed that the majority of children with a fever did not need an antibiotic, while 89.4% (n=915) were aware that antibiotics are used to cure infections caused by bacteria. Logistic regression analysis with parents' knowledge of antibiotics as the dependent variable found no statistically significant associations between this and years of parenting experience or key socio-demographic factors (Supplemental Table 2). The majority of parents, 89.7% (n=917), knew that antibiotics are not used to cure viral infections. Female sex and having a third level education were independently associated with correctly

1  
2  
3 answering that antibiotics are not used to cure infections caused by viruses (Supplemental  
4 Table 2).  
5  
6  
7

#### 8 Help seeking and expectations 9

10  
11 A large proportion of parents (69.8% n=709) would visit the GP because of fever in their  
12 child. Amongst the most common reasons to visit a GP when a child had fever were; fever  
13 lasting more than three days and, fever accompanied by a skin rash.  
14  
15

16  
17 More than half of parents (51.6%) had visited a GP at an out of hours practice with their child  
18 because of fever. Level of satisfaction with GP services during both office and out of hours  
19 was high as shown in Table 2. Greater than one-third of parents (39.4% n=385) had seen  
20 different doctors with their child due to fever. Of these parents, 31.3% (n=111) indicated that  
21 they had received different information from these doctors regarding fever in their child e.g.  
22 “Some say treat others say if not high let it run its course”, “Some say 37.5°C is fever and  
23 some say 38°C is a fever”.  
24  
25  
26  
27  
28  
29  
30  
31  
32  
33  
34  
35  
36  
37  
38  
39  
40  
41  
42  
43  
44  
45  
46  
47  
48  
49  
50  
51  
52  
53  
54  
55  
56  
57  
58  
59  
60



Table 2. Level of satisfaction with GP services provided

|                                                                                 | Office hours/outside office hours | Strongly disagree/disagree | Neutral       | Agree/strongly agree |
|---------------------------------------------------------------------------------|-----------------------------------|----------------------------|---------------|----------------------|
| <b>I was satisfied after the visit</b>                                          | Office hours (n=753)              | 10.1% (n=76)               | 9.4% (n=71)   | 80.5% (n=606)        |
|                                                                                 | Outside of office hours (n=508)   | 19.9% (n=101)              | 15% (n=76)    | 65.1% (n=331)        |
| <b>I felt appeased after the visit</b>                                          | Office hours (n=752)              | 10.4% (n=78)               | 11.4% (n=86)  | 78.2% (n=588)        |
|                                                                                 | Outside of office hours (n=506)   | 19.6% (n=99)               | 19.8% (n=100) | 60.6% (n=307)        |
| <b>The GP took into account my reasons for consulting at that moment</b>        | Office hours (n=752)              | 7.4% (n=56)                | 7.2% (n=54)   | 85.4% (n=642)        |
|                                                                                 | Outside of office hours (n=508)   | 13.2% (n=67)               | 14.8% (n=75)  | 72% (n=366)          |
| <b>The GP had enough attention for my questions</b>                             | Office hours (n=751)              | 9.8% (n=74)                | 11.1% (n=83)  | 79.1% (n=594)        |
|                                                                                 | Outside of office hours (n=506)   | 17.6% (n=89)               | 17.6% (n=89)  | 64.8% (n=328)        |
| <b>I got enough information about fever in the case of my child</b>             | Office hours (n=749)              | 11.5% (n=86)               | 15.5% (n=116) | 73% (n=547)          |
|                                                                                 | Outside of office hours (n=506)   | 21.4% (n=108)              | 17.3% (n=87)  | 61.3% (n=311)        |
| <b>I got enough information about alarm symptoms</b>                            | Office hours (n=749)              | 15% (n=112)                | 13.6% (n=102) | 71.4% (n=535)        |
|                                                                                 | Outside of office hours (n=506)   | 22.9% (n=116)              | 16.6% (n=84)  | 60.5% (n=306)        |
| <b>I got enough information on the expected duration of illness of my child</b> | Office hours (n=750)              | 14.8% (n=111)              | 17.5% (n=131) | 67.7% (n=508)        |
|                                                                                 | Outside of office hours (n=505)   | 25.7% (n=130)              | 20.4% (n=103) | 53.9% (n=272)        |

Parents' primary reason for visiting the GP was to obtain a physical exam for their child (72.2% n=598). The next most important reason was to get advice on alarm symptoms

(9.4%), followed by reassurance (5.7%). Parents rarely visited the GP to obtain medication such as antibiotics (2.9%) or paracetamol (2.3%).

#### *Use of GP services with introduction of free GP care for children*

The majority of parents (87.5% n=734) indicated that the introduction of free GP care in Ireland (July 2015[28]) had not impacted on how often they have or will consult the GP in future regarding fever.

#### Information sources

Figure 1 below illustrates sources of information used by parents.

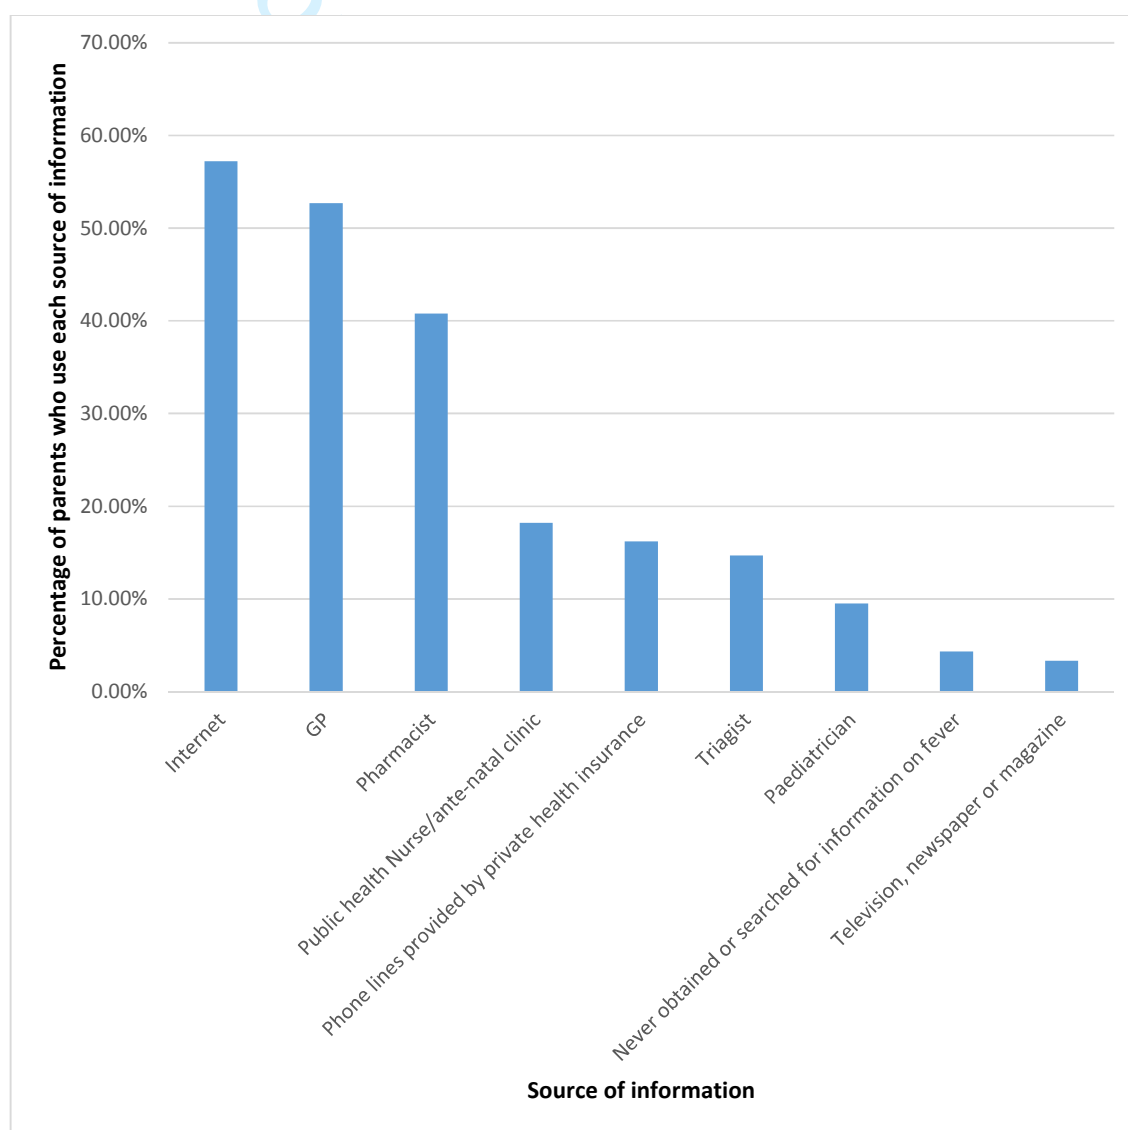

Figure 1. Sources of information used. Respondents could indicate more than one source.

1  
2  
3 A large proportion of parents (40.7% n=341) always seek information about alarm symptoms  
4 (e.g. drowsiness, fatigue) when their child has a fever.  
5  
6

7 The data indicate that the majority of parents (79.5% n=660) would prefer to receive  
8 information about fever before their child gets sick. When their child is sick, almost three-  
9 quarters of parents (74.2% n=617) would prefer to receive information about fever from a  
10 GP. A further 12.3% (n=102) would be happy to receive information from a pharmacist.  
11 When their child is not sick, parents indicated that they prefer to receive information by  
12 searching for the information on the internet (28.1% n=233). A further 27% (n=224) would  
13 prefer to receive information from a nurse, 25.5% (n=211) from a pharmacist and 19.4%  
14 (n=161) from a GP.  
15  
16  
17  
18  
19

20 The data indicates that parents (39.1%) would like to receive information about fever in a  
21 number of ways (verbally, on paper and through an internet site). A further 34.5% would  
22 prefer to receive information verbally and on paper.  
23  
24  
25  
26  
27

#### 28 Fever management practices 29

30  
31 Greater than one-third of parents (37.4% n=413) give medication when fever is higher than  
32 38°C. A minority of parents (1.2% n=13) do not give medication when their child has a  
33 fever.  
34  
35

36 The majority of parents (98.4% n=999) would give medication to their children such as  
37 paracetamol before first consulting a doctor. Similarly 94.5% (n=959) would give medication  
38 such as paracetamol to their children before first consulting a pharmacist.  
39  
40

41  
42 More than three-quarters of parents (84.4% n=854) would not use fever-reducing medication  
43 to together, however almost two-thirds of parents (64.6% n=714) alternate between fever-  
44 reducing medications. There were no apparent associations between whether the parent  
45 reported alternating fever-reducing medications and years of parenting experience or key  
46 socio-demographic factors (Supplemental Table 1). The majority of parents (81.8% n=830)  
47 indicated that they use liquid or oral forms of medication. Suppository or rectal forms of  
48 medication were favoured by 10% (n=102) of parents. A small number of parents (1.1%  
49 n=11) preferred not to use medication while 3.8% (n=39) use methods other than medication  
50 to reduce fever (e.g. tepid sponging).  
51  
52  
53  
54  
55  
56  
57  
58  
59  
60

### Concerns, attitudes and beliefs

Almost two-thirds of parents (60.4% n=667) were worried about the consequences of fever in general, while only 27.2% (n=301) of parents were of the opinion that fever may be beneficial to their child's health. Fear of fever was also related to a fear of dehydration (47.7% n=526), fear of febrile convulsions (74.5% n=822), and a fear of fever leading to brain damage (31.3% n=345). Greater than three-quarters of parents (80.5% n=890) agreed that fever causes discomfort. A statistically significant association was observed between parental worry about the consequences of fever and age of the parent  $\chi^2 (4) = 9.531, p = 0.049$ . Older parents (41 years of age and older) were more likely to disagree that they worry about the consequences of fever, while younger parents (20-30 years of age) were less likely to disagree that they worry about the consequences of fever.

The majority of parents (53.5% n=590) believe that they can determine whether or not their child has a fever by touching his/her forehead or skin. A statistically significant association was observed between whether or not parents believe that they can determine if their child has a fever by touching his/her forehead or skin and the number of children  $\chi^2 (2) = 10.964, p = 0.004$ . Parents with more than one child were more likely to believe that they could determine if their child has a fever by touching his/her forehead or skin than parents with only one child.

### Discussion

The study shows that parental knowledge regarding correct definition of febrile temperature is deficient, with many parents identifying fever when temperatures are either above or below the accepted level. Parental knowledge concerning the purpose and appropriate uses of antibiotics was found to be good. Parents regularly consulted the GP when their child had a fever, however if parents consulted more than one doctor when their child had a fever (e.g. GP, out-of-hours doctor, specialist) they often received conflicting information from each doctor. Parents' main source of information was via the internet or from a GP. The majority of parents would give medication when their child has a fever (with or without accompanying symptoms). Most parents do not give antipyretic medication together, however almost two-thirds of parents alternate between antipyretic medications to reduce fever symptoms. The majority of parents revealed that they are worried about the consequences of fever. Contrary

1  
2  
3 to expectations, neither parental experience, nor key socio-demographic characteristics, were  
4 generally predictive of parental knowledge or reported behaviours.  
5  
6  
7

8  
9 A substantial proportion of parents involved in this research selected incorrect temperatures  
10 to define fever which is similar to existing literature.[7 29-34] This study confirms that  
11 parents are still detecting and managing fevers at temperatures which are below the  
12 recommended temperature for fever (38°C).[7] It also shows that parents are not identifying  
13 fevers when their child's temperature is above normal fever temperature definition. However,  
14 considerably more of the population included in this research (63.1%) selected incorrect  
15 temperatures at which to define fever when contrasted with existing research (22%-56%).[7  
16 29-32] The higher level of incorrect answers shown in this study may reflect a more accurate  
17 representation of the prevalence of misinformation as a larger sample size increases precision  
18 of estimates. Nevertheless, the inclusion of a greater proportion of highly educated  
19 individuals when compared with previous research should have decreased the number of  
20 incorrect answers as education and health literacy are intrinsically linked.[35] This study  
21 demonstrates that evidence-based information resources need to be directed at all parents as  
22 demographic factors (e.g. level of education) have no impact on parents' knowledge of fever  
23 definition. Similar to previous research, the majority of parents were worried about the  
24 consequences of fever.[1 3 7 19 21-23 31 34 36-40] This may have contributed to their  
25 frequent use of antipyretics which concurs with existing literature.[3 7 11 14-16 23] Similar  
26 to previous research, parents also indicated that they prefer liquid to suppository forms of  
27 medication.[14] Furthermore, parents indicated that they often alternate between fever-  
28 reducing medications but rarely use them together. Guidelines recommend that antipyretics  
29 are not used alternately to decrease the risk of dosing errors and toxicity,[4 41] nonetheless  
30 previous research has indicated that parents do alternate between fever-reducing  
31 medications.[3 12 40] The inclusion of a large proportion of highly educated parents may  
32 have influenced this result as previous research has shown that highly educated parents tend  
33 to medicate more regularly than less well educated individuals.[11] Parents demonstrated a  
34 good level of knowledge regarding infections and antibiotic use which is similar to previous  
35 research.[7] This result may reflect the education level of the included sample. However, it  
36 may also reflect improvements based on a European campaign aimed at reducing unnecessary  
37 prescriptions for antibiotics and decreasing antibiotic resistance.[42]  
38  
39  
40  
41  
42  
43  
44  
45  
46  
47  
48  
49  
50  
51  
52  
53  
54  
55  
56  
57  
58  
59  
60

1  
2  
3  
4  
5 The natural and favourable biologic nature of fever should be communicated to parents,[43]  
6 both before the child gets sick and when the child is sick. Furthermore, specific information  
7 regarding alternating between fever-reducing medications should be conveyed to parents in  
8 user friendly and accessible language. As pharmacists are one of the most accessible  
9 healthcare professionals, they are in a prime position to offer this advice to parents  
10 purchasing antipyretics. Previous research has also suggested that nurses are in a prime  
11 position to offer this advice.[44] It is clear, therefore, that in order to provide information  
12 which may decrease pressure on GPs to examine children with benign fever, information  
13 resources need to be designed, produced and made available to parents, which concurs with  
14 existing research.[14] Providing parents with evidence-based information in a form which is  
15 accessible, understandable and concise should increase awareness and thus decrease over-use  
16 of antipyretics where administration disagrees with guidelines. It may alleviate unnecessary  
17 presentations at healthcare facilities for assessment and treatment. Tackling the issue of  
18 inappropriate detection and management of fever does not have a single solution but requires  
19 a suite of initiatives similar to those used to increase awareness regarding antibiotic  
20 prescribing.[42 45] Information and media campaigns have proven to effectively reduce  
21 patient desire for antibiotics where there is insignificant need.[42] Furthermore, advertising,  
22 marketing and sponsorship of antipyretics should be reviewed by governments in line with  
23 standards for advertising of prescription medication. The media have a large role to play in  
24 communicating with parents and patients in general. Perhaps the media could play a role in  
25 communicating an effective message to parents of children regarding management of fever  
26 and febrile illness.  
27  
28  
29  
30  
31  
32  
33  
34  
35  
36  
37  
38  
39  
40  
41  
42  
43

44 Future work should investigate the feasibility of an intervention to assist parents to manage  
45 fever and febrile illness in their children effectively. Empowering parents to take  
46 responsibility for effective care of their children should be a key public health issue.  
47 Furthermore, the knowledge and beliefs of healthcare professionals should be investigated to  
48 understand if parents' misinformation, attitudes and beliefs are as a result of healthcare  
49 professionals' misinformation, beliefs or out-dated information on the topic.  
50  
51  
52  
53  
54  
55  
56  
57  
58  
59  
60

1  
2  
3 The large sample size is one of the major strengths of this study. Furthermore, beliefs and  
4 opinions were captured in a non-clinical setting. This may portray more realistic attitudes and  
5 concerns than those captured at the point of care or in acute care settings as the influence of  
6 stressful situations may be eliminated. A limitation of the study is that we cannot estimate  
7 response rate from the web-based study. The most prominent issue with cross-sectional  
8 studies is responder bias as non-participation in questionnaire-based studies is rarely  
9 random.[46] However, we do not believe this has altered the findings of this study as they are  
10 reasonably comparable with existing international studies. This study included a large  
11 proportion of highly educated parents, which may not be representative of the general  
12 population. This would, reduce the external validity as results may not be generalisable to the  
13 entire population. When interpreting these results, the reader needs to consider the  
14 demographic of the included population. We minimised the effect of response bias associated  
15 with internet users by incorporating a paper-based element to the questionnaire. We tested for  
16 associations between the source of information (school vs. web based), finding no evidence  
17 of differential responses. Additionally it is likely that there is a high percentage of internet  
18 users among the target population (parents of young children), therefore any response bias  
19 with regard to use of the internet is minimal. In the models we have reported, we measured  
20 parental experience by the total number of years they had been parents (i.e. the age of their  
21 oldest child). We estimated similar models where total number of children or total child-years  
22 of parenting were used to reflect experience, but there were no appreciable differences in the  
23 conclusions drawn from these models and those we have reported here.  
24  
25  
26  
27  
28  
29  
30  
31  
32  
33  
34  
35  
36  
37  
38  
39

## 40 **Conclusion**

41  
42 Lack of knowledge and presence of misinformation regarding fever and febrile illness  
43 continues to be one of the most prevalent public health issues encountered by parents of  
44 young children. Despite increased efforts by guideline writers and national organisations,  
45 evidence-based fever management practices continue to be misunderstood or misinterpreted  
46 by a section of the population. These levels of misinformation and inappropriate management  
47 remain a primary concern to those attempting to improve child health and well-being and  
48 decrease unnecessary burden on healthcare services. The current research provides public  
49 policy makers with an up-to-date snapshot of current knowledge, attitudes and beliefs of  
50 parents concerning fever and febrile illness in children aged five years of age and younger.  
51  
52  
53  
54  
55  
56  
57

1  
2  
3 As nations aim to decrease pressure on healthcare services, a spotlight on parental concerns  
4 showcases the need for initiatives and interventions to empower parents to take informed  
5 responsibility for the care and management of their child when they have a fever or febrile  
6 illness.  
7  
8  
9

## 10 11 12 13 **Acknowledgements**

14  
15  
16 We would like to thank all the parents who contributed to this research.  
17  
18  
19  
20  
21

## 22 23 **Contributor details**

24  
25 Maria Kelly: Ms. Kelly conceptualized and designed the study, adjusted the questionnaire to  
26 reflect custom and practice in Ireland, applied for ethical approval, recruited parents, inputted  
27 data into excel, performed statistical analysis, compiled the results, reviewed and revised the  
28 manuscript and approved the final manuscript as submitted.  
29  
30  
31

32  
33 Laura J Sahm: Dr Sahm conceptualized and designed the study, assisted with adjustment of  
34 the questionnaire to reflect custom and practice in Ireland, reviewed, revised and approved  
35 the manuscript the final manuscript, and submitted the manuscript.  
36  
37

38  
39 Frances Shiely: Dr. Shiely conceptualized and designed the study, reviewed and revised the  
40 manuscript, and approved the final manuscript as submitted.  
41

42  
43 Ronan O'Sullivan: Professor O'Sullivan conceptualized and designed the study and approved  
44 the final manuscript as submitted.  
45

46  
47 Eefje de Bont: designed and validated the original questionnaire, approved adjustments to  
48 reflect custom and practice in Ireland, reviewed and revised the manuscript, and approved the  
49 final manuscript as submitted.  
50

51  
52 Aoife McGillicuddy: assisted with statistical analysis, reviewed and revised the manuscript  
53 and approved the final manuscript as submitted.  
54

55  
56 Roisin Herlihy: assisted with data entry and approved the final manuscript as submitted.  
57



1  
2  
3 Darren Dahly: designed and performed logistic regression modelling, reviewed and revised  
4 the manuscript and approved the final manuscript as submitted.  
5

6  
7 Suzanne McCarthy: Dr. McCarthy conceptualized and designed the study, assisted with  
8 adjustment of the questionnaire to reflect custom and practice in Ireland, assisted with  
9 statistical interpretations, reviewed and revised the manuscript and approved the final  
10 manuscript as submitted.  
11  
12

### 13 14 15 **Data Sharing**

16  
17  
18 Consent was not obtained from parents to share their data. The presented data are  
19 anonymised and risk of identification is negligible. A full dataset of results is available from  
20 the corresponding author.  
21  
22  
23

### 24 25 **Competing Interests**

26  
27  
28 All authors have completed the ICMJE uniform disclosure form at  
29 [www.icmje.org/coi\\_disclosure.pdf](http://www.icmje.org/coi_disclosure.pdf) and declare: no support from any organisation for the  
30 submitted work; no financial relationships with any organisations that might have an interest  
31 in the submitted work in the previous three years; no other relationships or activities that  
32 could appear to have influenced the submitted work.  
33  
34  
35  
36

### 37 38 39 **Funding**

40  
41  
42 This research received no specific grant from any funding agency in the public, commercial  
43 or not-for-profit sectors. The HRB Clinical Research Facility Cork support publication costs  
44 associated with this study.  
45  
46  
47

### 48 49 **Ethical Approval**

50  
51  
52 Ethical approval for this study was obtained from the Clinical Research Ethics Committee of  
53 the Cork Teaching Hospitals prior to starting the study (reference ECM 4 (y)). Written  
54  
55  
56  
57

1  
2  
3 informed consent forms were not deemed necessary by the Ethics Committee as participation  
4 indicated consent to take part in the study.  
5  
6  
7  
8

## 9 **References**

- 10  
11 1. Purssell E, Collin J. Fever phobia: The impact of time and mortality – A systematic review  
12 and meta-analysis. *International Journal of Nursing Studies* 2016;**56**:81-89|.
- 13 2. Eldalo AS. Saudi parent's attitude and practice about self-medicating their children.  
14 *Archives of Pharmacy Practice* 2013;**4**(2):57-62
- 15 3. Teagle AR, Powell CV. Is fever phobia driving inappropriate use of antipyretics? *Archives*  
16 *of Disease in Childhood* 2014;**99**(7):701-02.
- 17 4. Feverish illness in children: Assessment and initial management in children younger than 5  
18 years. National Institute for Health and Clinical Excellence - Clinical Guidelines 2013
- 19 5. Crocetti M, Moghbeli N, Serwint J. Fever phobia revisited: have parental misconceptions  
20 about fever changed in 20 years? *Pediatrics* 2001;**107**(6):1241-6
- 21 6. Fields E, Chard J, Murphy MS, *et al.* Assessment and initial management of feverish  
22 illness in children younger than 5 years: summary of updated NICE guidance. *BMJ*  
23 **2013**;346.
- 24 7. De Bont EG, Francis NA, Dinant GJ, *et al.* Parents' knowledge, attitudes, and practice in  
25 childhood fever: An internet-based survey. *British Journal of General Practice*  
26 **2014**;64(618):e10-e16
- 27 8. International Classification of Diseases. ICD-10-CM Diagnosis Code R50.9. 2016.  
28 <http://apps.who.int/classifications/icd10/browse/2016/en#/R50.9>. Last accessed  
29 28/10/16.
- 30 9. de Bont EG, Brand PL, Dinant GJ, *et al.* Risks and benefits of paracetamol in children with  
31 fever. *Nederlands Tijdschrift voor Geneeskunde* 2014;**158**(2):A6636
- 32 10. Clarke P. Evidence-Based Management of Childhood Fever: What Pediatric Nurses Need  
33 to Know. *Journal of Pediatric Nursing* 2014;**29**(4):372-75.
- 34 11. Jensen JF, Tønnesen LL, Söderström M, *et al.* Paracetamol for feverish children: Parental  
35 motives and experiences. *Scandinavian Journal of Primary Health Care*  
36 **2010**;28(2):115-20.
- 37 12. Walsh A, Edwards H, Fraser J. Over-the-counter medication use for childhood fever: A  
38 cross-sectional study of Australian parents. *Journal of Paediatrics & Child Health*  
39 **2007**;43(9):601-06
- 40 13. Kelly M, McCarthy S, O'Sullivan R, *et al.* Drivers for inappropriate fever management in  
41 children: a systematic review. *International Journal Clinical Pharmacy*  
42 **2016**;38(4):761-70.
- 43 14. Kelly M, Sahm LJ, Shiely F, *et al.* Parental knowledge, attitudes and beliefs regarding  
44 fever in children: an interview study. *BMC Public Health* 2016;**16**:540.
- 45 15. Cinar ND, Altun İ, Altinkaynak S, Walsh A. Turkish parents' management of childhood  
46 fever: A cross-sectional survey using the PFMS-TR. *Australasian Emergency Nursing*  
47 *Journal* 2014;**17**(1):3-10.
- 48 16. Kelly L, Morin K, Young D. Improving caretakers' knowledge of fever management in  
49 preschool children: is it possible? *Journal of Pediatric Healthcare* 1996;**10**(4):167-73.
- 50 17. Lagerlov P, Loeb M, Slettevoll J, *et al.* Severity of illness and the use of paracetamol in  
51 febrile preschool children; a case simulation study of parents' assessments. *Family*  
52 *Practice* 2006;**23**(6):618-23

18. Maguire S, Ranmal R, Komulainen S, *et al.* Which urgent care services do febrile children use and why? *Archives of Disease in Childhood* 2011;**96**(9):810-16.
19. Nijman RG, Oostenbrink R, Dons EM, Bouwhuis CB, Moll HA. Parental fever attitude and management: influence of parental ethnicity and child's age. *Pediatric Emergency Care* 2010;**26**(5):339-42.
20. Sakai R, Nijjima S, Marui E. Parental knowledge and perceptions of fever in children and fever management practices: differences between parents of children with and without a history of febrile seizures. *Pediatric Emergency Care* 2009;**25**(4):231-37
21. Tessler H, Gorodischer R, Press J, *et al.* Unrealistic concerns about fever in children: the influence of cultural-ethnic and sociodemographic factors. *The Israel Medical Association journal.* 2008;**10**(5):346-9
22. Stuijvenberg Mv, Vos Sd, Tjiang GCH, *et al.* Parents' fear regarding fever and febrile seizures. *Acta Pædiatrica* 1999;**88**(6):618-22.
23. Walsh A, Edwards H, Fraser J. Parents' childhood fever management: community survey and instrument development. *Journal of Advanced Nursing* 2008;**63**(4):376-88.
24. Huang Y, Gu J, Zhang M, *et al.* Knowledge, attitude and practice of antibiotics: a questionnaire study among 2500 Chinese students. *BMC Medical Education* 2013;**13**:163.
25. Cals JW, Boumans D, Lardinois RJ, *et al.* Public beliefs on antibiotics and respiratory tract infections: an internet-based questionnaire study. *The British Journal of General Practice.* 2007;**57**(545):942-7.
26. Godycki-Cwirko M, Cals JW, Francis N, *et al.* Public beliefs on antibiotics and symptoms of respiratory tract infections among rural and urban population in Poland: a questionnaire study. *PLoS One* 2014;**9**(10):e109248.
27. R Core Team (2016). R: A language and environment for statistical computing. R Foundation for Statistical Computing, Vienna, Austria. <https://www.R-project.org/>. last accessed 15/11/16.
28. Department of Health. Minister Reilly announces free GP care for children aged 5 and under as part of Budget 2014 Progress made in achieving more for less but 2014 will be a challenging year for the health services, 2014.
29. Kramer MS, Naimark L, Leduc DG. Parental fever phobia and its correlates. *Pediatrics* 1985;**75**(6):1110-3
30. Taveras EM, Duroseu S, Flores G. Parents' beliefs and practices regarding childhood fever: A study of a multiethnic and socioeconomically diverse sample of parents. *Pediatric Emergency Care* 2004;**20**(9):579-87
31. Cohee LM, Crocetti MT, Serwint JR, *et al.* Ethnic differences in parental perceptions and management of childhood fever. *Clinical Pediatrics* 2010;**49**(3):221-7.
32. Al-Eissa YA, Al-Sanie AM, Al-Alola SA, *et al.* Parental perceptions of fever in children. *Annals of Saudi Medicine* 2000;**20**(3-4):202-05
33. Bertille N, Fournier-Charriere E, Pons G, *et al.* Managing fever in children: a national survey of parents' knowledge and practices in France. *PLoS One* 2013;**8**(12):e83469.
34. Sahm LJ, Kelly M, McCarthy S, *et al.* Knowledge, attitudes and beliefs of parents regarding fever in children: a Danish interview study. *Acta Paediatrica* 2016;**105**(1):69-73.
35. Kickbusch IS. Health literacy: addressing the health and education divide. *Health Promotion International* 2001;**16**(3):289-97.
36. Zyoud SH, Al-Jabi SW, Sweileh WM, *et al.* Beliefs and practices regarding childhood fever among parents: A cross-sectional study from Palestine. *BMC Pediatrics* 2013;**13**(1).

- 1  
2  
3 37. Erkek N, Senel S, Sahin M, *et al.* Parents' perspectives to childhood fever: Comparison of  
4 culturally diverse populations. *Journal of Paediatrics and Child Health*  
5 2010;**46**(10):583-87.
- 6 38. Chang LC, Liu CC, Huang MC. Parental knowledge, concerns, and management of  
7 childhood fever in Taiwan. *J Nurs Res* 2013;**21**(4):252-60.
- 8 39. Athamneh L, El-Mughrabi M, Athamneh M, *at al.* Parents' Knowledge, Attitudes and  
9 Beliefs of Childhood Fever Management in Jordan: a Cross-Sectional Study. *Journal*  
10 *of Applied Research on Children* 2014;**5**(1)
- 11 40. Chiappini E, Parretti A, Becherucci P, *et al.* Parental and medical knowledge and  
12 management of fever in Italian pre-school children. *BMC Pediatrics* 2012;**12**:97.
- 13 41. Hewson P. Paracetamol: overused in childhood fever. *Australian Prescriber* 2000;**23**(3)
- 14 42. McNulty CA, Cookson BD, Lewis MA. Education of healthcare professionals and the  
15 public. *J Antimicrob Chemother* 2012;**67** Suppl 1:i11-8.
- 16 43. Mistry N, Hudak A. Combined and alternating acetaminophen and ibuprofen therapy for  
17 febrile children. *Paediatrics & Child Health* 2014;**19**(10):531-32
- 18 44. Banks T, Paul SP, Wall M. Managing fever in children with a single antipyretic. *Nursing*  
19 *Times* 2013;**109**(7):24-5
- 20 45. Arnold SR, Straus SE. Interventions to improve antibiotic prescribing practices in  
21 ambulatory care. *The Cochrane Database of Systematic Reviews* 2005(4):Cd003539.
- 22 46. Levin KA. Study design III: Cross-sectional studies. *Evidence-based Dentistry*  
23 2006;**7**(1):24-5.  
24  
25  
26  
27  
28  
29  
30  
31  
32  
33  
34  
35  
36  
37  
38  
39  
40  
41  
42  
43  
44  
45  
46  
47  
48  
49  
50  
51  
52  
53  
54  
55  
56  
57  
58  
59  
60

Supplemental Table 1. Estimated associations between (ORs and 95% CIs) parental experience and key socio-demographic variables with parental knowledge.

|                                   | <i>Dependent variable:</i> |                   |
|-----------------------------------|----------------------------|-------------------|
|                                   | Q1 Correct<br>(1)          | Q7 Correct<br>(2) |
| Years of parenting experience     | 0.99 (0.98, 1.01)          | 1.01 (0.99, 1.03) |
| Age (years)                       | 0.98 (0.94, 1.01)          | 1.05 (1.02, 1.10) |
| Female (vs. male)                 | 0.88 (0.42, 1.76)          | 1.40 (0.64, 2.88) |
| Any 3rd level education (vs none) | 0.69 (0.42, 1.12)          | 1.49 (0.92, 2.40) |
| Has a partner (vs. none)          | 0.48 (0.20, 1.02)          | 0.94 (0.45, 1.88) |
| Constant                          | 13.78 (2.77, 72.62)        | 0.20 (0.04, 1.04) |
| Observations                      | 800                        | 792               |
| Log Likelihood                    | -518.03                    | -466.30           |
| Akaike Inf. Crit.                 | 1,048.05                   | 944.60            |

1  
2  
3  
4  
5  
6  
7  
8  
9  
10  
11  
12  
13  
14  
15  
16  
17  
18  
19  
20  
21  
22  
23  
24  
25  
26  
27  
28  
29  
30  
31  
32  
33  
34  
35  
36  
37  
38  
39  
40  
41  
42  
43  
44  
45  
46  
47

Supplemental Table 2. Estimated associations between (ORs and 95%CIs) parental experience and key socio-demographic variables with parental knowledge.

|                                   | <i>Dependent variable:</i> |                     |                     |                      |                     |
|-----------------------------------|----------------------------|---------------------|---------------------|----------------------|---------------------|
|                                   | q10a_correct<br>(1)        | q10b_correct<br>(2) | q10c_correct<br>(3) | q10d_correct<br>(4)  | q10e_correct<br>(5) |
| Years of parenting experience     | 0.99 (0.98, 1.01)          | 1.01 (0.99, 1.03)   | 0.97 (0.94, 1.01)   | 1.02 (0.99, 1.06)    | 1.01 (0.99, 1.03)   |
| Age (years)                       | 0.98 (0.94, 1.01)          | 1.05 (1.02, 1.10)   | 1.08 (1.01, 1.16)   | 0.94 (0.89, 0.99)    | 1.03 (0.99, 1.07)   |
| Female (vs. male)                 | 0.88 (0.42, 1.76)          | 1.40 (0.64, 2.88)   | 1.18 (0.19, 4.19)   | 0.18 (0.08, 0.42)    | 1.05 (0.52, 2.29)   |
| Any 3rd level education (vs none) | 0.69 (0.42, 1.12)          | 1.49 (0.92, 2.40)   | 1.74 (0.73, 3.74)   | 0.45 (0.24, 0.89)    | 0.61 (0.39, 0.99)   |
| Has a partner (vs. none)          | 0.48 (0.20, 1.02)          | 0.94 (0.45, 1.88)   | 0.72 (0.11, 2.52)   | 0.60 (0.25, 1.65)    | 0.77 (0.39, 1.58)   |
| Constant                          | 13.78 (2.77, 72.62)        | 0.20 (0.04, 1.04)   | 1.00 (0.05, 27.60)  | 11.26 (1.06, 117.08) | 0.24 (0.05, 1.23)   |
| Observations                      | 798                        | 799                 | 799                 | 798                  | 799                 |
| Log Likelihood                    | -550.70                    | -145.93             | -172.06             | -229.36              | -474.98             |
| Akaike Inf. Crit.                 | 1,113.39                   | 303.86              | 356.13              | 470.73               | 961.97              |

**STROBE 2007 (v4) Statement—Checklist of items that should be included in reports of *cross-sectional studies***

| Section/Topic                | Item # | Recommendation                                                                                                                                                                       | Reported on page # |
|------------------------------|--------|--------------------------------------------------------------------------------------------------------------------------------------------------------------------------------------|--------------------|
| Title and abstract           | 1      | (a) Indicate the study's design with a commonly used term in the title or the abstract                                                                                               | 1,2                |
|                              |        | (b) Provide in the abstract an informative and balanced summary of what was done and what was found                                                                                  | 2                  |
| <b>Introduction</b>          |        |                                                                                                                                                                                      |                    |
| Background/rationale         | 2      | Explain the scientific background and rationale for the investigation being reported                                                                                                 | 2,3                |
| Objectives                   | 3      | State specific objectives, including any prespecified hypotheses                                                                                                                     | 3                  |
| <b>Methods</b>               |        |                                                                                                                                                                                      |                    |
| Study design                 | 4      | Present key elements of study design early in the paper                                                                                                                              | 3,4                |
| Setting                      | 5      | Describe the setting, locations, and relevant dates, including periods of recruitment, exposure, follow-up, and data collection                                                      | 3                  |
| Participants                 | 6      | (a) Give the eligibility criteria, and the sources and methods of selection of participants                                                                                          | 3                  |
| Variables                    | 7      | Clearly define all outcomes, exposures, predictors, potential confounders, and effect modifiers. Give diagnostic criteria, if applicable                                             | 3,4                |
| Data sources/<br>measurement | 8*     | For each variable of interest, give sources of data and details of methods of assessment (measurement). Describe comparability of assessment methods if there is more than one group | 3,4                |
| Bias                         | 9      | Describe any efforts to address potential sources of bias                                                                                                                            | 4                  |
| Study size                   | 10     | Explain how the study size was arrived at                                                                                                                                            | 3                  |
| Quantitative variables       | 11     | Explain how quantitative variables were handled in the analyses. If applicable, describe which groupings were chosen and why                                                         | 4                  |
| Statistical methods          | 12     | (a) Describe all statistical methods, including those used to control for confounding                                                                                                | 4                  |
|                              |        | (b) Describe any methods used to examine subgroups and interactions                                                                                                                  | 4                  |
|                              |        | (c) Explain how missing data were addressed                                                                                                                                          | 4                  |
|                              |        | (d) If applicable, describe analytical methods taking account of sampling strategy                                                                                                   | 4                  |
|                              |        | (e) Describe any sensitivity analyses                                                                                                                                                | N/A                |
| <b>Results</b>               |        |                                                                                                                                                                                      |                    |
| Participants                 | 13*    | (a) Report numbers of individuals at each stage of study—eg numbers potentially eligible, examined for eligibility, confirmed                                                        | 5-10               |

|                          |     |                                                                                                                                                                                                              |       |
|--------------------------|-----|--------------------------------------------------------------------------------------------------------------------------------------------------------------------------------------------------------------|-------|
|                          |     | eligible, included in the study, completing follow-up, and analysed                                                                                                                                          |       |
|                          |     | (b) Give reasons for non-participation at each stage                                                                                                                                                         | N/A   |
|                          |     | (c) Consider use of a flow diagram                                                                                                                                                                           | N/A   |
| Descriptive data         | 14* | (a) Give characteristics of study participants (eg demographic, clinical, social) and information on exposures and potential confounders                                                                     | 5     |
|                          |     | (b) Indicate number of participants with missing data for each variable of interest                                                                                                                          | 5-10  |
| Outcome data             | 15* | Report numbers of outcome events or summary measures                                                                                                                                                         | 5-10  |
| Main results             | 16  | (a) Give unadjusted estimates and, if applicable, confounder-adjusted estimates and their precision (eg, 95% confidence interval). Make clear which confounders were adjusted for and why they were included | 5-10  |
|                          |     | (b) Report category boundaries when continuous variables were categorized                                                                                                                                    | 5-10  |
|                          |     | (c) If relevant, consider translating estimates of relative risk into absolute risk for a meaningful time period                                                                                             | N/A   |
| Other analyses           | 17  | Report other analyses done—eg analyses of subgroups and interactions, and sensitivity analyses                                                                                                               | 5-10  |
| <b>Discussion</b>        |     |                                                                                                                                                                                                              |       |
| Key results              | 18  | Summarise key results with reference to study objectives                                                                                                                                                     | 10,11 |
| Limitations              | 19  | Discuss limitations of the study, taking into account sources of potential bias or imprecision. Discuss both direction and magnitude of any potential bias                                                   | 12,13 |
| Interpretation           | 20  | Give a cautious overall interpretation of results considering objectives, limitations, multiplicity of analyses, results from similar studies, and other relevant evidence                                   | 11-14 |
| Generalisability         | 21  | Discuss the generalisability (external validity) of the study results                                                                                                                                        | 12,13 |
| <b>Other information</b> |     |                                                                                                                                                                                                              |       |
| Funding                  | 22  | Give the source of funding and the role of the funders for the present study and, if applicable, for the original study on which the present article is based                                                | 15    |

\*Give information separately for cases and controls in case-control studies and, if applicable, for exposed and unexposed groups in cohort and cross-sectional studies.

**Note:** An Explanation and Elaboration article discusses each checklist item and gives methodological background and published examples of transparent reporting. The STROBE checklist is best used in conjunction with this article (freely available on the Web sites of PLoS Medicine at <http://www.plosmedicine.org/>, Annals of Internal Medicine at <http://www.annals.org/>, and Epidemiology at <http://www.epidem.com/>). Information on the STROBE Initiative is available at [www.strobe-statement.org](http://www.strobe-statement.org).



# BMJ Open

## Parental knowledge, attitudes and beliefs on fever - a cross-sectional study in Ireland

|                                 |                                                                                                                                                                                                                                                                                                                                                                                                                                                                                                                                                                                                                                                                                                                                                                                                                                                                                                                                                                                                                                                                                     |
|---------------------------------|-------------------------------------------------------------------------------------------------------------------------------------------------------------------------------------------------------------------------------------------------------------------------------------------------------------------------------------------------------------------------------------------------------------------------------------------------------------------------------------------------------------------------------------------------------------------------------------------------------------------------------------------------------------------------------------------------------------------------------------------------------------------------------------------------------------------------------------------------------------------------------------------------------------------------------------------------------------------------------------------------------------------------------------------------------------------------------------|
| Journal:                        | <i>BMJ Open</i>                                                                                                                                                                                                                                                                                                                                                                                                                                                                                                                                                                                                                                                                                                                                                                                                                                                                                                                                                                                                                                                                     |
| Manuscript ID                   | bmjopen-2016-015684.R1                                                                                                                                                                                                                                                                                                                                                                                                                                                                                                                                                                                                                                                                                                                                                                                                                                                                                                                                                                                                                                                              |
| Article Type:                   | Research                                                                                                                                                                                                                                                                                                                                                                                                                                                                                                                                                                                                                                                                                                                                                                                                                                                                                                                                                                                                                                                                            |
| Date Submitted by the Author:   | 03-Apr-2017                                                                                                                                                                                                                                                                                                                                                                                                                                                                                                                                                                                                                                                                                                                                                                                                                                                                                                                                                                                                                                                                         |
| Complete List of Authors:       | Kelly, Maria; University College Cork National University of Ireland, School of Pharmacy<br>Sahm, Laura; University College Cork, School of Pharmacy; Mercy University Hospital, Pharmacy Department<br>Shiely, Frances; University College Cork, Epidemiology and Public Health<br>O'Sullivan, Ronan; National Children's Research Centre, Paediatric Emergency Care Research Unit (PERU); University College Cork National University of Ireland, School of Medicine<br>de Bont, Eefje; Maastricht University, research institute CAPHRI, Family Medicine<br>McGillicuddy, Aoife; University College Cork National University of Ireland, School of Pharmacy<br>Herlihy, Roisin; University College Cork National University of Ireland, School of Pharmacy<br>Dahly, Darren; University College Cork National University of Ireland, 4Department of Epidemiology and Public Health, University College Cork, Cork, Ireland<br>McCarthy, Suzanne; University College Cork National University of Ireland, School of Pharmacy; Cork University Hospital Group, Pharmacy Department |
| <b>Primary Subject Heading</b>: | Public health                                                                                                                                                                                                                                                                                                                                                                                                                                                                                                                                                                                                                                                                                                                                                                                                                                                                                                                                                                                                                                                                       |
| Secondary Subject Heading:      | Paediatrics, Health services research, Health policy, General practice / Family practice                                                                                                                                                                                                                                                                                                                                                                                                                                                                                                                                                                                                                                                                                                                                                                                                                                                                                                                                                                                            |
| Keywords:                       | Community child health < PAEDIATRICS, Fever, Temperature, Parents, Attitude, Knowledge                                                                                                                                                                                                                                                                                                                                                                                                                                                                                                                                                                                                                                                                                                                                                                                                                                                                                                                                                                                              |
|                                 |                                                                                                                                                                                                                                                                                                                                                                                                                                                                                                                                                                                                                                                                                                                                                                                                                                                                                                                                                                                                                                                                                     |

SCHOLARONE™  
Manuscripts

1  
2  
3  
4 **Parental knowledge, attitudes and beliefs on fever – a cross-sectional study in Ireland**  
5  
6  
7

8  
9 **Address correspondence to:** Maria Kelly, Pharmaceutical Care Research Group, School of  
10 Pharmacy, University College Cork, Ireland, maria.kelly@ucc.ie, 0035321 490 1676  
11

12 Kelly M<sup>1,2</sup>, Sahm L J<sup>1,3</sup>, Shiely F<sup>2,4</sup>, O’Sullivan R<sup>5,6</sup>, de Bont E G<sup>7</sup>, Mc Gillicuddy A<sup>1</sup>,  
13 Herlihy R<sup>1</sup>, Dahly D<sup>2,4</sup> and McCarthy S<sup>1,8</sup>  
14  
15

16 <sup>1</sup>Pharmaceutical Care Research Group, School of Pharmacy, University College Cork,  
17 Ireland; <sup>2</sup>HRB Clinical Research Facility, Mercy figureUniversity Hospital, Cork, Ireland;  
18 <sup>3</sup>Department of Pharmacy, Mercy University Hospital, Cork, Ireland; <sup>4</sup>Department of  
19 Epidemiology and Public Health, University College Cork, Cork, Ireland; <sup>5</sup>School of  
20 Medicine, University College Cork, Cork, Ireland; <sup>6</sup>National Children’s Research Centre,  
21 Dublin 12, Ireland; <sup>7</sup>Department of Family Medicine, CAPHRI School for Public Health and  
22 Primary Care, Maastricht University, PO Box 616, 6200 MD, Maastricht, The Netherlands,  
23 <sup>8</sup>Cork University Hospital, Cork, Ireland.  
24  
25

26  
27 **Running Title:** Parental knowledge of fever; a questionnaire study  
28  
29

30 **Word count:** 3143  
31  
32  
33  
34  
35  
36  
37  
38  
39  
40  
41  
42  
43  
44  
45  
46  
47  
48  
49  
50  
51  
52  
53  
54  
55  
56  
57  
58  
59  
60

## Abstract

### Objectives

Fever is a common symptom of mostly benign illness in young children, yet concerning for parents. The aim of this study was to describe parental knowledge, attitudes and beliefs regarding fever in children aged  $\leq$  five years of age.

### Design

A cross-sectional study using a previously validated questionnaire. Results were analysed using descriptive statistics and multivariable logistic regression.

### Setting

Purposively selected primary schools (n=8) in Cork, Ireland using a paper-based questionnaire. Data were collected from a cross-sectional internet-based questionnaire with a convenience sample of parents via webpages (n=10) previously identified in an interview study.

### Participants

Parents with at least one child aged  $\leq$  five years were invited to participate in the study.

### Main outcome measures

Parental knowledge, attitudes and beliefs when managing fever in children.

### Results

1104 parents contributed to this research (121 parents from schools and 983 parents through an online questionnaire). Almost two-thirds of parents (63.1%) identified temperatures at which they define fever that were either below or above the recognised definition of temperature ( $38^{\circ}\text{C}$ ). Nearly two of every three parents (64.6%) alternate between two fever-reducing medications when managing a child's fever. Amongst parents, years of parenting experience, age, sex, educational status, or marital status did not predict being able to correctly identify a fever, neither did they predict if the parent alternated between fever-reducing medications.

### Conclusions

Parental knowledge of fever and fever management was found to be deficient which concurs with existing literature. Parental experience and other socio-demographic factors were generally not helpful in identifying parents with high or low levels of knowledge. Resources to help parents when managing a febrile illness need to be introduced to help all parents provide effective care.

**Key Words:** child, fever, temperature, parents, knowledge, attitude

## Article Summary

### Strengths and Limitations

- A large number of parents were recruited for this study which is one of the major strengths of this study.
- Beliefs and opinions were captured in a non-clinical setting which may portray more realistic attitudes and concerns than those captured at the point of care or in acute care settings.
- The questionnaire used in this study was previously validated.
- A limitation of the study is that we cannot estimate response rate from the web-based study.
- Participants were mainly mothers or had third level education which limits generalisability of findings.

### Introduction

Fever, defined as a regulated rise in temperature, is common in childhood,[1-4] however fever episodes are rarely a symptom of serious illness.[1, 5, 6]

Fever is commonly defined as a temperature of 38<sup>0</sup>C or above.[7, 8] Fever on its own does not require treatment,[9] and guidelines recommend that antipyretics should only be used when the child is also distressed or in pain.[4] However, research suggests that parents often misuse antipyretics by over- or under-dosing,[10, 11] or by routinely alternating between antipyretics when managing a fever,[12] despite guidance to the contrary.[4]

Studies examining parents' attitudes and beliefs around fever are limited.[13] The majority of published studies were conducted in secondary care where perceptions may be biased as children may be acutely unwell, placing stress on the parents and possibly influencing responses.[13] Consequently, the National Institute of Health and Care Excellence (NICE), together with their guideline development group have suggested that studies examining home antipyretic use and parental help-seeking behaviour be completed.[6] To help address these gaps, we surveyed parental knowledge, attitudes and beliefs around childhood fever and febrile illness.

### Methods

1  
2  
3 Cross-sectional data for this study were collected from parents with at least one child aged  
4 five years of age or younger, and were recruited from one of two sources: purposively  
5 selected primary schools (n=8) in Cork, Ireland and via the internet (websites and webpages  
6 n=10 (Supplemental Table 1)) during December 2015 and January 2016. No major public  
7 health initiatives were initiated during that time. The schools were selected to maximise  
8 sample variation, and included urban and rural settings; large and small schools; and schools  
9 that were, and were not designated as delivering education to children and young people who  
10 are experiencing, or are at risk of experiencing, educational disadvantage. The websites and  
11 webpages used to recruit parents for the internet questionnaire were selected from previous  
12 qualitative work with parents (Supplemental Table 1).[14] A review of existing literature  
13 suggested a sample size of  $\geq 600$  parents would be adequate to ensure generalisability of  
14 responses.[7, 12, 15-23] Data collection in schools took place over one week in December  
15 2015, while responses from the internet questionnaire were obtained in January 2016. There  
16 were no incentives for participation. School based parents provided written informed consent,  
17 whereas consent was implied from online participation.  
18  
19  
20  
21  
22  
23  
24  
25  
26

27  
28 The questionnaire administered in this study was developed and used in previous research.[7,  
29 24-26] The questionnaire was modified to reflect custom and practice in Ireland and piloted  
30 with a sample of five parents. It consisted of 38 questions with sub-themes. Response  
31 options, including yes/no, agree/disagree, and Likert scales were used. The questionnaire  
32 assessed parental knowledge, help-seeking behaviours and expectations, needs for additional  
33 resources, fever management practices, use of pharmaceutical products, and concerns,  
34 attitudes (feelings about) and beliefs.  
35  
36  
37  
38

39  
40 Respondents' answers were entered into a Microsoft Excel (2013) data file. Available cases  
41 were analysed. Paper-based responses were entered by RH (a researcher not involved in the  
42 care of participants). A random sample of 20% of paper-based responses were checked for  
43 accuracy by MK. Where data were missing, available cases were analysed. Data were  
44 analysed using SPSS version 22.0 (SPSS, Inc., Chicago IL) and R version 3.3.1. [27]  
45  
46  
47  
48  
49  
50  
51  
52  
53  
54  
55  
56  
57  
58  
59  
60

1  
2  
3 Crude associations between categorical variables were assessed using Pearson's Chi-square  
4 test. P values <0.05 were considered to be statistically significant, given a null hypothesis of  
5 independence. Multivariable logistic regression was used to estimate covariate adjusted  
6 associations, reported as odds ratios (ORs) and 95% confidence intervals (CIs), between key  
7 socio-demographic predictors (years of parental experience, respondent age, sex, educational  
8 level, and marital/partner status) and each the following dependent variables: whether the  
9 parent identified the correct temperature indicative of a fever, and whether they reported  
10 alternating fever-reducing medications.  
11  
12  
13  
14  
15

### 16 17 18 Participant involvement

19  
20  
21 A previous qualitative study on this topic conducted by the research team,[14] found that  
22 parents identified fever as a priority when caring for young children, however parents  
23 perceived that they lacked knowledge. Following on from this study, a small number of  
24 parents were asked to participate in the design of this study. Parents were not involved in  
25 recruiting other parents. Study participants who indicated that they would like to receive a  
26 copy of the final report were provided with the report.  
27  
28  
29  
30  
31  
32  
33  
34  
35

## 36 37 Results

### 38 39 40 Parents' characteristics

41  
42  
43 A total of 121 parents recruited from schools completed the paper-based questionnaire  
44 (response rate 42%), while 983 parents contributed using the online questionnaire. Overall,  
45 1104 parents contributed to this research. Although the majority of parents were white Irish  
46 (91.8%, n=746), parents representing 34 nationalities participated in the study.  
47  
48  
49  
50

51 Demographic information is listed in Table 1  
52  
53  
54  
55  
56  
57

Table 1. Demographic information

|                                 |                   | Overall    | Website/webpage sample | School sample |
|---------------------------------|-------------------|------------|------------------------|---------------|
| Gender                          | N                 | 817        | 696                    | 121           |
|                                 | Male              | 4.5%       | 3.7%                   | 9.1%          |
|                                 | Female            | 95.5%      | 96.3%                  | 90.9%         |
| Age of parents                  | N                 | 805        | 685                    | 120           |
|                                 | Range (years)     | 20-55      | 20-51                  | 26-55         |
|                                 | Mean (SD)         | 35.3 (4.8) | 34.7 (4.5)             | 38.3 (4.7)    |
| Number of children (n=817)      | N                 | 817        | 696                    | 121           |
|                                 | Range             | 1-7        | 1-6                    | 1-7           |
|                                 | Median (IQR)      | 2 (2)      | 2 (2)                  | 2 (2)         |
| Education level                 | N                 | 816        | 696                    | 120           |
|                                 | Primary level     | 0.2%       | 0.3%                   | 0%            |
|                                 | Secondary level   | 11.6%      | 11.4%                  | 13.3%         |
|                                 | Third level       | 88.2%      | 88.4%                  | 86.7%         |
| Marital status/living situation | N                 | 816        | 696                    | 120           |
|                                 | Married           | 79.3%      | 77.6%                  | 89.2%         |
|                                 | Co-habiting       | 15.6%      | 17.1%                  | 6.7%          |
|                                 | Single            | 3.3%       | 3.3%                   | 3.3%          |
|                                 | Divorced          | 1%         | 1.1%                   | 0%            |
|                                 | Widowed           | 0.6%       | 0.6%                   | 0.8%          |
|                                 | Civil partnership | 0.2%       | 0.3%                   | 0%            |

## Knowledge

Parents (n=1104) indicated that they considered temperatures between 36°C and over 40°C indicative of fever. Almost two-thirds of parents (63.1%) identified temperatures at which they define fever that were either below (44%) or above (19.1%) the recognised definition of temperature (38°C).[7, 8] Logistic regression analysis showed no apparent associations between reporting the correct definition of fever temperature and years of parenting experience or key socio-demographic factors (Supplemental Table 2).

1  
2  
3 Parents illustrated a good level of knowledge regarding infections and medication. Most  
4 parents (94.9% n=971) believed that the majority of children with a fever did not need an  
5 antibiotic, while 89.4% (n=915) were aware that antibiotics are used to cure infections caused  
6 by bacteria. Logistic regression analysis with parents' knowledge of antibiotics as the  
7 dependent variable found no statistically significant associations between this and years of  
8 parenting experience or key socio-demographic factors (Supplemental Table 3). The majority  
9 of parents, 89.7% (n=917), knew that antibiotics are not used to cure viral infections. Female  
10 sex and having a third level education were independently associated with correctly  
11 answering that antibiotics are not used to cure infections caused by viruses (Supplemental  
12 Table 3).  
13  
14  
15  
16  
17  
18  
19  
20

### 21 Help seeking and expectations

22  
23  
24 A large proportion of parents (69.8% n=709) had visited the GP because of fever in their  
25 child. Amongst the most common reasons selected to visit a GP when a child had fever were;  
26 fever lasting more than three days and, fever accompanied by a skin rash.  
27  
28

29  
30 More than half of parents (51.6%) had visited a GP at an out of hours practice with their child  
31 because of fever. The of parents when they consult GPs are shown Table 2 below. Greater  
32 than one-third of parents (39.4% n=385) had seen different doctors with their child due to  
33 fever. Of these parents, 31.3% (n=111) indicated that they had received conflicting  
34 information from these doctors regarding fever in their child e.g. "Some say treat others say if  
35 not high let it run its course", "Some say 37.5°C is fever and some say 38°C is a fever".  
36  
37  
38  
39  
40  
41  
42  
43  
44  
45  
46  
47  
48  
49  
50  
51  
52  
53  
54  
55  
56  
57  
58  
59  
60



Table 2. Parental expectations when they consult a GP due to fever in a child

|                               |               |
|-------------------------------|---------------|
| Obtain a physical examination | 72.2% (n=598) |
| Get advice on alarm symptoms  | 9.4% (n=78)   |
| Reassurance                   | 5.7% (n=48)   |
| To obtain antibiotics         | 2.9% (n=24)   |
| To obtain paracetamol         | 2.3% (n=19)   |

#### *Use of GP services with introduction of free GP care for children*

The majority of parents (87.5% n=734) indicated that the introduction of free GP care in Ireland (July 2015 [28]) had not impacted on how often they have or will consult the GP in future regarding fever.

#### Information sources

Figure 1 below illustrates sources of information used by parents.

<<Insert Figure 1 here>>

The data indicate that the majority of parents (79.5% n=660) would prefer to receive information about fever before their child gets sick. When their child is sick, almost three-quarters of parents (74.2% n=617) would prefer to receive information about fever from a GP. A further 12.3% (n=102) would be happy to receive information from a pharmacist. When their child is not sick, parents indicated that they prefer to receive information by

1  
2  
3 searching for the information on the internet (28.1% n=233). A further 27% (n=224) would  
4 prefer to receive information from a nurse, 25.5% (n=211) from a pharmacist and 19.4%  
5 (n=161) from a GP.  
6

7  
8 The data indicates that parents (39.1%) would like to receive information about fever in a  
9 number of ways (verbally, on paper and through an internet site). A further 34.5% would  
10 prefer to receive information verbally and on paper.  
11  
12

### 13 14 15 Parents' methods for managing childhood fever

16  
17  
18 Greater than one-third of parents (37.4% n=413) give medication when fever is higher than  
19 38°C. A minority of parents (1.2% n=13) do not give medication when their child has a  
20 fever.  
21  
22

23  
24 More than three-quarters of parents (84.4% n=854) would not use fever-reducing medication  
25 to together, however almost two-thirds of parents (64.6% n=714) alternate between fever-  
26 reducing medications. There were no apparent associations between whether the parent  
27 reported alternating fever-reducing medications and years of parenting experience or key  
28 socio-demographic factors (Supplemental Table 2). The majority of parents (81.8% n=830)  
29 indicated that they use liquid or oral forms of medication. Suppository or rectal forms of  
30 medication were favoured by 10% (n=102) of parents. A small number of parents (1.1%  
31 n=11) preferred not to use medication while 3.8% (n=39) use methods other than medication  
32 to reduce fever (e.g. tepid sponging).  
33  
34  
35  
36  
37  
38

### 39 Concerns, attitudes and beliefs

40  
41  
42 Almost two-thirds of parents (60.4% n=667) were worried about the consequences of fever in  
43 general, while only 27.2% (n=301) of parents were of the opinion that fever may be  
44 beneficial to their child's health. Reasons parents selected to fear fever are shown in Table 3  
45 below.  
46  
47  
48

49 Table 3. Parental reasons to fear fever

|               |                                                                                                                                       |
|---------------|---------------------------------------------------------------------------------------------------------------------------------------|
| Fear of fever | Fear of dehydration (47.7% n=526)<br>Fear of febrile convulsions (74.5% n=822)<br>Fear of fever leading to brain damage (31.3% n=345) |
|---------------|---------------------------------------------------------------------------------------------------------------------------------------|

1  
2  
3  
4  
5  
6  
7 Greater than three-quarters of parents (80.5% n=890) agreed that fever causes discomfort. A  
8 statistically significant association was observed between parental worry about the  
9 consequences of fever and age of the parent  $\chi^2 (4) = 9.531, p=0.049$ . Older parents (41 years  
10 of age and older) were more likely to disagree that they worry about the consequences of  
11 fever, while younger parents (20-30 years of age) were less likely to disagree that they worry  
12 about the consequences of fever.  
13  
14  
15  
16  
17  
18  
19

## 20 Discussion

21  
22 The study shows that parental knowledge regarding correct definition of febrile temperature  
23 is deficient, with many parents identifying fever when temperatures are either above or below  
24 the accepted level. Parental knowledge concerning the purpose and appropriate uses of  
25 antibiotics was found to be good. Parents regularly consulted the GP when their child had a  
26 fever, however if parents consulted more than one doctor when their child had a fever (e.g.  
27 GP, out-of-hours doctor, specialist) they often received conflicting information from each  
28 doctor. Parents' main source of information was via the internet or from a GP. The majority  
29 of parents would give medication when their child has a fever (with or without accompanying  
30 symptoms). Most parents do not give antipyretic medication together, however almost two-  
31 thirds of parents alternate between antipyretic medications to reduce fever symptoms. The  
32 majority of parents revealed that they are worried about the consequences of fever. Contrary  
33 to expectations, neither parental experience, nor key socio-demographic characteristics, were  
34 generally predictive of parental knowledge or reported behaviours.  
35  
36  
37  
38  
39  
40  
41  
42  
43  
44  
45  
46

47 A substantial proportion of parents involved in this research selected incorrect temperatures  
48 to define fever which is similar to existing literature.[7, 29-34] This study confirms that  
49 parents are still detecting and managing fevers at temperatures which are below the  
50 recommended temperature for fever ( $38^{\circ}\text{C}$ ).[7] It also shows that parents are not identifying  
51 fevers when their child's temperature is above normal fever temperature definition. However,  
52 considerably more of the population included in this research (63.1%) selected incorrect  
53  
54  
55  
56  
57  
58  
59  
60

1  
2  
3 temperatures at which to define fever when contrasted with existing research (22%-56%).[7,  
4 29-32] The higher level of incorrect answers shown in this study may reflect a more accurate  
5 representation of the prevalence of misinformation as a larger sample size increases precision  
6 of estimates. Nevertheless, the inclusion of a greater proportion of highly educated  
7 individuals when compared with previous research should have decreased the number of  
8 incorrect answers as education and health literacy are intrinsically linked.[35] This study  
9 demonstrates that evidence-based information resources need to be directed at all parents as  
10 demographic factors (e.g. level of education) have no impact on parents' knowledge of fever  
11 definition. Similar to previous research, the majority of parents were worried about the  
12 consequences of fever.[1, 3, 7, 19, 21-23, 31, 34, 36-40] This may have contributed to their  
13 frequent use of antipyretics which concurs with existing literature.[3, 7, 11, 14-16, 23]  
14 Similar to previous research, parents also indicated that they prefer liquid to suppository  
15 forms of medication.[14] Furthermore, parents indicated that they often alternate between  
16 fever-reducing medications but rarely use them together. Guidelines recommend that  
17 antipyretics are not used alternately to decrease the risk of dosing errors and toxicity,[4, 41]  
18 nonetheless previous research has indicated that parents do alternate between fever-reducing  
19 medications.[3, 12, 40] The inclusion of a large proportion of highly educated parents may  
20 have influenced this result as previous research has shown that highly educated parents tend  
21 to medicate more regularly than less well educated individuals.[11] Parents demonstrated a  
22 good level of knowledge regarding infections and antibiotic use which is similar to previous  
23 research.[7] This result may reflect the education level of the included sample. However, it  
24 may also reflect improvements based on a European campaign aimed at reducing unnecessary  
25 prescriptions for antibiotics and decreasing antibiotic resistance.[42]

26  
27  
28  
29  
30  
31  
32  
33  
34  
35  
36  
37  
38  
39  
40  
41  
42  
43 The natural and favourable biologic nature of fever should be communicated to parents,[43]  
44 both before the child gets sick and when the child is sick. Furthermore, specific information  
45 regarding alternating between fever-reducing medications should be conveyed to parents in  
46 user friendly and accessible language. It is clear, therefore, that in order to provide  
47 information which may decrease pressure on GPs to examine children with benign fever,  
48 information resources need to be designed, produced and made available to parents, which  
49 concurs with existing research.[14] Providing parents with evidence-based information in a  
50 form which is accessible, understandable and concise should increase awareness and thus  
51 decrease over-use of antipyretics where administration disagrees with guidelines. It may

1  
2  
3 alleviate unnecessary presentations at healthcare facilities for assessment and treatment.  
4 Tackling the issue of inappropriate detection and management of fever does not have a single  
5 solution but requires a suite of initiatives similar to those used to increase awareness  
6 regarding antibiotic prescribing.[42, 44] Information and media campaigns have proven to  
7 effectively reduce patient desire for antibiotics where there is insignificant need.[42]  
8 Furthermore, advertising, marketing and sponsorship of antipyretics should be reviewed by  
9 governments in line with standards for advertising of prescription medication. The media  
10 have a large role to play in communicating with parents and patients in general. Perhaps the  
11 media could play a role in communicating an effective message to parents of children  
12 regarding management of fever and febrile illness.  
13  
14  
15  
16  
17  
18  
19  
20  
21

22 Future work should investigate the feasibility of an intervention to assist parents to manage  
23 fever and febrile illness in their children effectively. Empowering parents to take  
24 responsibility for effective care of their children should be a key public health issue.  
25 Furthermore, the knowledge and beliefs of healthcare professionals should be investigated to  
26 understand if parents' misinformation, attitudes and beliefs are as a result of healthcare  
27 professionals' misinformation, beliefs or out-dated information on the topic.  
28  
29  
30  
31  
32

33 The large sample size is one of the major strengths of this study. Furthermore, beliefs and  
34 opinions were captured in a non-clinical setting. This may portray more realistic attitudes and  
35 concerns than those captured at the point of care or in acute care settings as the influence of  
36 stressful situations may be eliminated. A limitation of the study is that we cannot estimate  
37 response rate from the web-based study. A further limitation is the low response rate from the  
38 school based study. The most prominent issue with cross-sectional studies is responder bias  
39 as non-participation in questionnaire-based studies is rarely random.[45] However, we do not  
40 believe this has altered the findings of this study as they are reasonably comparable with  
41 existing international studies. This study included a large proportion of highly educated  
42 parents, which may not be representative of the general population. Similarly, the included  
43 sample did not reflect diverse ethnic backgrounds. This would, reduce the external validity as  
44 results may not be generalisable to the entire population. When interpreting these results, the  
45 reader needs to consider the demographic of the included population. We minimised the  
46 effect of response bias associated with internet users by incorporating a paper-based element  
47 to the questionnaire. However, the response rate from the paper-based questionnaire was low  
48  
49  
50  
51  
52  
53  
54  
55  
56  
57  
58  
59  
60

1  
2  
3 (42%). We tested for associations between the source of information (school vs. web based),  
4 finding no evidence of differential responses. Additionally, it is likely that there is a high  
5 percentage of internet users among the target population (parents of young children),  
6 therefore any response bias with regard to use of the internet is minimal. In the models we  
7 have reported, we measured parental experience by the total number of years they had been  
8 parents (i.e. the age of their oldest child). We estimated similar models where total number of  
9 children or total child-years of parenting were used to reflect experience, but there were no  
10 appreciable differences in the conclusions drawn from these models and those we have  
11 reported here.  
12  
13  
14  
15  
16  
17  
18  
19

## 20 **Conclusion**

21  
22  
23 Lack of knowledge and presence of conflicting information regarding fever and febrile illness  
24 continues to be one of the most prevalent public health issues encountered by parents of  
25 young children. Despite increased efforts by guideline writers and national organisations,  
26 evidence-based fever management practices continue to be misunderstood or misinterpreted  
27 by a section of the population. These levels of misinformation and inappropriate management  
28 remain a primary concern to those attempting to improve child health and well-being and  
29 decrease unnecessary burden on healthcare services. The current research provides public  
30 policy makers with an up-to-date snapshot of current knowledge, attitudes and beliefs of  
31 parents concerning fever and febrile illness in children aged five years of age and younger.  
32  
33  
34  
35  
36  
37  
38  
39  
40  
41  
42  
43  
44  
45  
46  
47  
48  
49  
50  
51  
52  
53  
54  
55  
56  
57  
58  
59  
60  
As nations aim to decrease pressure on healthcare services, a spotlight on parental concerns  
showcases the need for initiatives and interventions to empower parents to take informed  
responsibility for the care and management of their child when they have a fever or febrile  
illness.

## 52 **Acknowledgements**

55 We would like to thank all the parents who contributed to this research.

## Contributor details

Maria Kelly: Ms. Kelly conceptualized and designed the study, adjusted the questionnaire to reflect custom and practice in Ireland, applied for ethical approval, recruited parents, inputted data into excel, preformed statistical analysis, compiled the results, reviewed and revised the manuscript and approved the final manuscript as submitted.

Laura J Sahm: Dr Sahm conceptualized and designed the study, assisted with adjustment of the questionnaire to reflect custom and practice in Ireland, reviewed, revised and approved the manuscript the final manuscript, and submitted the manuscript.

Frances Shiely: Dr. Shiely conceptualized and designed the study, reviewed and revised the manuscript, and approved the final manuscript as submitted.

Ronan O'Sullivan: Professor O'Sullivan conceptualized and designed the study and approved the final manuscript as submitted.

Eefje de Bont: designed and validated the original questionnaire, approved adjustments to reflect custom and practice in Ireland, reviewed and revised the manuscript, and approved the final manuscript as submitted.

Aoife McGillicuddy: assisted with statistical analysis, reviewed and revised the manuscript and approved the final manuscript as submitted.

Roisin Herlihy: assisted with data entry and approved the final manuscript as submitted.

Darren Dahly: designed and preformed logistic regression modelling, reviewed and revised the manuscript and approved the final manuscript as submitted.

Suzanne McCarthy: Dr. McCarthy conceptualized and designed the study, assisted with adjustment of the questionnaire to reflect custom and practice in Ireland, assisted with statistical interpretations, reviewed and revised the manuscript and approved the final manuscript as submitted.

## Data Sharing

1  
2  
3 Consent was not obtained from parents to share their data. The presented data are  
4 anonymised and risk of identification is negligible. A full dataset of results is available from  
5 the corresponding author.  
6  
7

### 8 9 **Competing Interests**

10  
11  
12 All authors have completed the ICMJE uniform disclosure form at  
13 [www.icmje.org/coi\\_disclosure.pdf](http://www.icmje.org/coi_disclosure.pdf) and declare: no support from any organisation for the  
14 submitted work; no financial relationships with any organisations that might have an interest  
15 in the submitted work in the previous three years; no other relationships or activities that  
16 could appear to have influenced the submitted work.  
17  
18  
19  
20  
21  
22

### 23 **Funding**

24  
25  
26 This research received no specific grant from any funding agency in the public, commercial  
27 or not-for-profit sectors. The HRB Clinical Research Facility Cork support publication costs  
28 associated with this study.  
29  
30  
31  
32

### 33 **Ethical Approval**

34  
35  
36 Ethical approval for this study was obtained from the Clinical Research Ethics Committee of  
37 the Cork Teaching Hospitals prior to starting the study (reference ECM 4 (y)). Written  
38 informed consent forms were not deemed necessary by the Ethics Committee as participation  
39 indicated consent to take part in the study.  
40  
41  
42  
43  
44  
45

### 46 **References**

- 47 1. Pursell E, Collin J. Fever phobia: The impact of time and mortality – A systematic  
48 review and meta-analysis. *International Journal of Nursing Studies*. 2016;56:81-9.
- 49 2. Eldalo AS. Saudi parent's attitude and practice about self-medicating their children.  
50 *Archives of Pharmacy Practice*. 2013;4(2):57-62.
- 51 3. Teagle AR, Powell CV. Is fever phobia driving inappropriate use of antipyretics?  
52 *Archives of Disease in Childhood*. 2014;99(7):701-2.
- 53 4. Feverish illness in children: Assessment and initial management in children younger  
54 than 5 years. *National Institute for Health and Clinical Excellence - Clinical Guidelines*.  
55 2013.  
56  
57



5. Crocetti M, Moghbeli N, Serwint J. Fever phobia revisited: have parental misconceptions about fever changed in 20 years? *Pediatrics*. 2001;107(6):1241-6.
6. Fields E, Chard J, Murphy MS, *et al*. Assessment and initial management of feverish illness in children younger than 5 years: summary of updated NICE guidance. *BMJ*. 2013;346.
7. De Bont EGPM, Francis NA, Dinant GJ, *et al*. Parents' knowledge, attitudes, and practice in childhood fever: An internet-based survey. *British Journal of General Practice*. 2014;64(618):e10-e6.
8. International Classification of Diseases. ICD-10-CM Diagnosis Code R50.9 2016 Available from: <http://apps.who.int/classifications/icd10/browse/2016/en#/R50.9>. Last accessed 28/10/16.
9. de Bont EG, Brand PL, Dinant GJ, *et al*. Risks and benefits of paracetamol in children with fever. *Nederlands tijdschrift voor geneeskunde*. 2014;158(2):A6636.
10. Clarke P. Evidence-Based Management of Childhood Fever: What Pediatric Nurses Need to Know. *Journal of Pediatric Nursing*. 2014;29(4):372-5.
11. Jensen JF, Tønnesen LL, Söderström M, *et al*. Paracetamol for feverish children: Parental motives and experiences. *Scandinavian Journal of Primary Health Care*. 2010;28(2):115-20.
12. Walsh A, Edwards H, Fraser J. Over-the-counter medication use for childhood fever: A cross-sectional study of Australian parents. *Journal of Paediatrics & Child Health*. 2007;43(9):601-6.
13. Kelly M, McCarthy S, O'Sullivan R, *et al*. Drivers for inappropriate fever management in children: a systematic review. *International Journal of Clinical Pharmacy*. 2016;38(4):761-70.
14. Kelly M, Sahm LJ, Shiely F, *et al*. Parental knowledge, attitudes and beliefs regarding fever in children: an interview study. *BMC Public Health*. 2016;16:540.
15. Cinar ND, Altun İ, Altınkaynak S, *et al*. Turkish parents' management of childhood fever: A cross-sectional survey using the PFMS-TR. *Australasian Emergency Nursing Journal*. 2014;17(1):3-10.
16. Kelly L, Morin K, Young D. Improving caretakers' knowledge of fever management in preschool children: is it possible? *Journal of Pediatric Healthcare*. 1996;10(4):167-73.
17. Lagerlov P, Loeb M, Slettevoll J, *et al*. Severity of illness and the use of paracetamol in febrile preschool children; a case simulation study of parents' assessments. *Family Practice*. 2006;23(6):618-23.
18. Maguire S, Ranmal R, Komulainen S, *et al*. Which urgent care services do febrile children use and why? *Archives of Disease in Childhood*. 2011;96(9):810-6.
19. Nijman RG, Oostenbrink R, Dons EM, *et al*. Parental fever attitude and management: influence of parental ethnicity and child's age. *Pediatric Emergency Care*. 2010;26(5):339-42.
20. Sakai R, Nijjima S, Marui E. Parental knowledge and perceptions of fever in children and fever management practices: differences between parents of children with and without a history of febrile seizures. *Pediatric Emergency Care*. 2009;25(4):231-7.
21. Tessler H, Gorodischer R, Press J, *et al*. Unrealistic concerns about fever in children: the influence of cultural-ethnic and sociodemographic factors. *The Israel Medical Association journal*. 2008;10(5):346-9.
22. Stuijvenberg Mv, Vos Sd, Tjiang GC, *et al*. Parents' fear regarding fever and febrile seizures. *Acta Paediatrica*. 1999;88(6):618-22.
23. Walsh A, Edwards H, Fraser J. Parents' childhood fever management: community survey and instrument development. *Journal of Advanced Nursing*. 2008;63(4):376-88.

- 1  
2  
3 24. Huang Y, Gu J, Zhang M, *et al.* Knowledge, attitude and practice of antibiotics: a  
4 questionnaire study among 2500 Chinese students. *BMC Medical Education*. 2013;13:163.
- 5 25. Cals JW, Boumans D, Lardinois RJ, *et al.* Public beliefs on antibiotics and respiratory  
6 tract infections: an internet-based questionnaire study. *The British Journal of General  
7 Practice*. 2007;57(545):942-7.
- 8 26. Godycki-Cwirko M, Cals JW, Francis N, *et al.* Public beliefs on antibiotics and  
9 symptoms of respiratory tract infections among rural and urban population in Poland: a  
10 questionnaire study. *PLoS One*. 2014;9(10):e109248.
- 11 27. R Core Team (2016). R: A language and environment for statistical computing. R  
12 Foundation for Statistical Computing, Vienna, Austria. URL <https://www.R-project.org/>. Last  
13 accessed 15/11/16.
- 14 28. Department of Health. Minister Reilly announces free GP care for children aged 5 and  
15 under as part of Budget 2014 Progress made in achieving more for less but 2014 will be a  
16 challenging year for the health services [press release]. Department of Health, Dublin,  
17 Ireland, 2014.
- 18 29. Kramer MS, Naimark L, Leduc DG. Parental fever phobia and its correlates.  
19 *Pediatrics*. 1985;75(6):1110-3.
- 20 30. Taveras EM, Durousseau S, Flores G. Parents' beliefs and practices regarding  
21 childhood fever: A study of a multiethnic and socioeconomically diverse sample of parents.  
22 *Pediatric Emergency Care*. 2004;20(9):579-87.
- 23 31. Cohee LM, Crocetti MT, Serwint JR, *et al.* Ethnic differences in parental perceptions  
24 and management of childhood fever. *Clinical Pediatrics*. 2010;49(3):221-7.
- 25 32. Al-Eissa YA, Al-Sanie AM, Al-Alola SA, *et al.* Parental perceptions of fever in  
26 children. *Annals of Saudi Medicine*. 2000;20(3-4):202-5.
- 27 33. Bertille N, Fournier-Charriere E, Pons G, *et al.* Managing fever in children: a national  
28 survey of parents' knowledge and practices in France. *PLoS One*. 2013;8(12):e83469.
- 29 34. Sahm LJ, Kelly M, McCarthy S, *et al.* Knowledge, attitudes and beliefs of parents  
30 regarding fever in children: a Danish interview study. *Acta Paediatrica*. 2016;105(1):69-73.
- 31 35. Kickbusch IS. Health literacy: addressing the health and education divide. *Health  
32 Promotion International*. 2001;16(3):289-97.
- 33 36. Zyoud SH, Al-Jabi SW, Sweileh WM, *et al.* Beliefs and practices regarding childhood  
34 fever among parents: A cross-sectional study from Palestine. *BMC Pediatrics*. 2013;13(1).
- 35 37. Erkek N, Senel S, Sahin M, *et al.* Parents' perspectives to childhood fever:  
36 Comparison of culturally diverse populations. *Journal of Paediatrics and Child Health*.  
37 2010;46(10):583-7.
- 38 38. Chang LC, Liu CC, Huang MC. Parental knowledge, concerns, and management of  
39 childhood fever in Taiwan. *Journal of Nursing Research*. 2013;21(4):252-60.
- 40 39. Athamneh L, El-Mughrabi M, Athamneh M, *at al.* Parents' Knowledge, Attitudes and  
41 Beliefs of Childhood Fever Management in Jordan: a Cross-Sectional Study. *Journal of  
42 Applied Research on Children*. 2014;5(1).
- 43 40. Chiappini E, Parretti A, Becherucci P, *et al.* Parental and medical knowledge and  
44 management of fever in Italian pre-school children. *BMC Pediatrics*. 2012;12:97.
- 45 41. Hewson P. Paracetamol: overused in childhood fever. *Australian Prescriber*.  
46 2000;23(3).
- 47 42. McNulty CA, Cookson BD, Lewis MA. Education of healthcare professionals and the  
48 public. *Journal of Antimicrob Chemother*. 2012;67 Suppl 1:i11-8.
- 49 43. Mistry N, Hudak A. Combined and alternating acetaminophen and ibuprofen therapy  
50 for febrile children. *Paediatrics & Child Health*. 2014;19(10):531-2.
- 51 44. Arnold SR, Straus SE. Interventions to improve antibiotic prescribing practices in  
52 ambulatory care. *The Cochrane Database of Systematic Reviews*. 2005(4):Cd003539.
- 53  
54  
55  
56  
57  
58  
59  
60

1  
2  
3 45. Levin KA. Study design III: Cross-sectional studies. *Evidence-based Dentistry*.  
4 2006;7(1):24-5.  
5  
6  
7  
8  
9  
10  
11  
12  
13  
14  
15  
16  
17  
18  
19  
20  
21  
22  
23  
24  
25  
26  
27  
28  
29  
30  
31  
32  
33  
34  
35  
36  
37  
38  
39  
40  
41  
42  
43  
44  
45  
46  
47  
48  
49  
50  
51  
52  
53  
54  
55  
56  
57  
58  
59  
60

For peer review only

1  
2  
3  
4  
5  
6  
7  
8  
9  
10  
11  
12  
13  
14  
15  
16  
17  
18  
19  
20  
21  
22  
23  
24  
25  
26  
27  
28  
29  
30  
31  
32  
33  
34  
35  
36  
37  
38  
39  
40  
41  
42  
43  
44  
45  
46  
47  
48  
49  
50  
51  
52  
53  
54  
55  
56  
57  
58  
59  
60

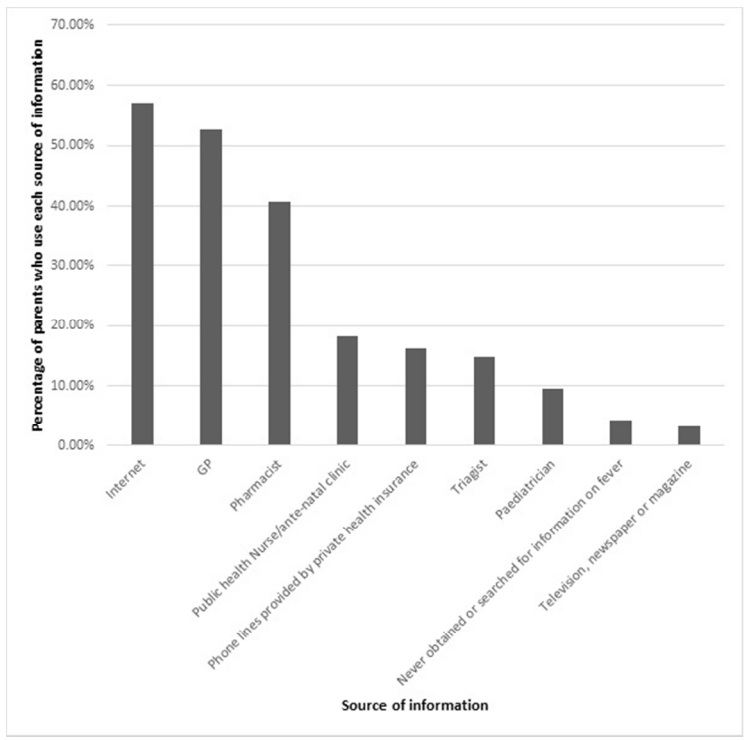

Figure 1. Sources of information used. Respondents could indicate more than one source.

69x50mm (300 x 300 DPI)

Pre-view only

Supplemental Table 1. Websites and webpages used to host questionnaire

|                                             |
|---------------------------------------------|
| Eumom                                       |
| Mummy Pages                                 |
| Recession Busting Moms                      |
| Schooldays                                  |
| Fulltimemum                                 |
| HerFamily                                   |
| Magicum                                     |
| Wonderbaba                                  |
| Fiona O'Farrell Nurturing Child Development |

Supplemental Table 2. Estimated associations between (ORs and 95% CIs) parental experience and key socio-demographic variables with parental knowledge.

|                                   | <i>Dependent variable:</i>                                    |                                                              |
|-----------------------------------|---------------------------------------------------------------|--------------------------------------------------------------|
|                                   | Knowledge of correct definition of fever temperature 38°C (1) | Do you alternate between fever reducing medications (no) (2) |
| Years of parenting experience     | 0.99 (0.98, 1.01)                                             | 1.01 (0.99, 1.03)                                            |
| Age (years)                       | 0.98 (0.94, 1.01)                                             | 1.05 (1.02, 1.10)                                            |
| Female (vs. male)                 | 0.88 (0.42, 1.76)                                             | 1.40 (0.64, 2.88)                                            |
| Any 3rd level education (vs none) | 0.69 (0.42, 1.12)                                             | 1.49 (0.92, 2.40)                                            |
| Has a partner (vs. none)          | 0.48 (0.20, 1.02)                                             | 0.94 (0.45, 1.88)                                            |
| Constant                          | 13.78 (2.77, 72.62)                                           | 0.20 (0.04, 1.04)                                            |
| Observations                      | 800                                                           | 792                                                          |
| Log Likelihood                    | -518.03                                                       | -466.30                                                      |
| Akaike Inf. Crit.                 | 1,048.05                                                      | 944.60                                                       |

Supplemental Table 3. Estimated associations between (ORs and 95% CIs) parental experience and key socio-demographic variables with parental knowledge.

|                                   | <i>Dependent variable:</i>                                               |                                                           |                                                                           |                                                                           |                                                            |
|-----------------------------------|--------------------------------------------------------------------------|-----------------------------------------------------------|---------------------------------------------------------------------------|---------------------------------------------------------------------------|------------------------------------------------------------|
|                                   | Every child with a fever needs fever reducing medications (false)<br>(1) | Every child with a fever needs antibiotics (false)<br>(2) | Antibiotics are used to treat infections caused by bacteria (true)<br>(3) | Antibiotics are used to treat infections caused by viruses (false)<br>(4) | In all cases of fever there is an infection (false)<br>(5) |
| Years of parenting experience     | 0.99 (0.98, 1.01)                                                        | 1.01 (0.99, 1.03)                                         | 0.97 (0.94, 1.01)                                                         | 1.02 (0.99, 1.06)                                                         | 1.01 (0.99, 1.03)                                          |
| Age (years)                       | 0.98 (0.94, 1.01)                                                        | 1.05 (1.02, 1.10)                                         | 1.08 (1.01, 1.16)                                                         | 0.94 (0.89, 0.99)                                                         | 1.03 (0.99, 1.07)                                          |
| Female (vs. male)                 | 0.88 (0.42, 1.76)                                                        | 1.40 (0.64, 2.88)                                         | 1.18 (0.19, 4.19)                                                         | 0.18 (0.08, 0.42)                                                         | 1.05 (0.52, 2.29)                                          |
| Any 3rd level education (vs none) | 0.69 (0.42, 1.12)                                                        | 1.49 (0.92, 2.40)                                         | 1.74 (0.73, 3.74)                                                         | 0.45 (0.24, 0.89)                                                         | 0.61 (0.39, 0.99)                                          |
| Has a partner (vs. none)          | 0.48 (0.20, 1.02)                                                        | 0.94 (0.45, 1.88)                                         | 0.72 (0.11, 2.52)                                                         | 0.60 (0.25, 1.65)                                                         | 0.77 (0.39, 1.58)                                          |
| Constant                          | 13.78 (2.77, 72.62)                                                      | 0.20 (0.04, 1.04)                                         | 1.00 (0.05, 27.60)                                                        | 11.26 (1.06, 117.08)                                                      | 0.24 (0.05, 1.23)                                          |
| Observations                      | 798                                                                      | 799                                                       | 799                                                                       | 798                                                                       | 799                                                        |
| Log Likelihood                    | -550.70                                                                  | -145.93                                                   | -172.06                                                                   | -229.36                                                                   | -474.98                                                    |
| Akaike Inf. Crit.                 | 1,113.39                                                                 | 303.86                                                    | 356.13                                                                    | 470.73                                                                    | 961.97                                                     |

**STROBE 2007 (v4) Statement—Checklist of items that should be included in reports of *cross-sectional studies***

| Section/Topic                | Item # | Recommendation                                                                                                                                                                       | Reported on page # |
|------------------------------|--------|--------------------------------------------------------------------------------------------------------------------------------------------------------------------------------------|--------------------|
| Title and abstract           | 1      | (a) Indicate the study's design with a commonly used term in the title or the abstract                                                                                               | 1,2                |
|                              |        | (b) Provide in the abstract an informative and balanced summary of what was done and what was found                                                                                  | 2                  |
| <b>Introduction</b>          |        |                                                                                                                                                                                      |                    |
| Background/rationale         | 2      | Explain the scientific background and rationale for the investigation being reported                                                                                                 | 3                  |
| Objectives                   | 3      | State specific objectives, including any prespecified hypotheses                                                                                                                     | 3                  |
| <b>Methods</b>               |        |                                                                                                                                                                                      |                    |
| Study design                 | 4      | Present key elements of study design early in the paper                                                                                                                              | 4,5                |
| Setting                      | 5      | Describe the setting, locations, and relevant dates, including periods of recruitment, exposure, follow-up, and data collection                                                      | 4                  |
| Participants                 | 6      | (a) Give the eligibility criteria, and the sources and methods of selection of participants                                                                                          | 4                  |
| Variables                    | 7      | Clearly define all outcomes, exposures, predictors, potential confounders, and effect modifiers. Give diagnostic criteria, if applicable                                             | 4,5                |
| Data sources/<br>measurement | 8*     | For each variable of interest, give sources of data and details of methods of assessment (measurement). Describe comparability of assessment methods if there is more than one group | 4,5                |
| Bias                         | 9      | Describe any efforts to address potential sources of bias                                                                                                                            | 4,5                |
| Study size                   | 10     | Explain how the study size was arrived at                                                                                                                                            | 4                  |
| Quantitative variables       | 11     | Explain how quantitative variables were handled in the analyses. If applicable, describe which groupings were chosen and why                                                         | 4,5                |
| Statistical methods          | 12     | (a) Describe all statistical methods, including those used to control for confounding                                                                                                | 4,5                |
|                              |        | (b) Describe any methods used to examine subgroups and interactions                                                                                                                  | 4,5                |
|                              |        | (c) Explain how missing data were addressed                                                                                                                                          | 4,5                |
|                              |        | (d) If applicable, describe analytical methods taking account of sampling strategy                                                                                                   | 4,5                |
|                              |        | (e) Describe any sensitivity analyses                                                                                                                                                | N/A                |
| <b>Results</b>               |        |                                                                                                                                                                                      |                    |
| Participants                 | 13*    | (a) Report numbers of individuals at each stage of study—eg numbers potentially eligible, examined for eligibility, confirmed                                                        | 5-10               |

|                          |     |                                                                                                                                                                                                              |       |
|--------------------------|-----|--------------------------------------------------------------------------------------------------------------------------------------------------------------------------------------------------------------|-------|
|                          |     | eligible, included in the study, completing follow-up, and analysed                                                                                                                                          |       |
|                          |     | (b) Give reasons for non-participation at each stage                                                                                                                                                         | N/A   |
|                          |     | (c) Consider use of a flow diagram                                                                                                                                                                           | N/A   |
| Descriptive data         | 14* | (a) Give characteristics of study participants (eg demographic, clinical, social) and information on exposures and potential confounders                                                                     | 5     |
|                          |     | (b) Indicate number of participants with missing data for each variable of interest                                                                                                                          | 5-11  |
| Outcome data             | 15* | Report numbers of outcome events or summary measures                                                                                                                                                         | 5-11  |
| Main results             | 16  | (a) Give unadjusted estimates and, if applicable, confounder-adjusted estimates and their precision (eg, 95% confidence interval). Make clear which confounders were adjusted for and why they were included | 5-11  |
|                          |     | (b) Report category boundaries when continuous variables were categorized                                                                                                                                    | 5-11  |
|                          |     | (c) If relevant, consider translating estimates of relative risk into absolute risk for a meaningful time period                                                                                             | N/A   |
| Other analyses           | 17  | Report other analyses done—eg analyses of subgroups and interactions, and sensitivity analyses                                                                                                               | 5-11  |
| <b>Discussion</b>        |     |                                                                                                                                                                                                              |       |
| Key results              | 18  | Summarise key results with reference to study objectives                                                                                                                                                     | 11    |
| Limitations              | 19  | Discuss limitations of the study, taking into account sources of potential bias or imprecision. Discuss both direction and magnitude of any potential bias                                                   | 11-14 |
| Interpretation           | 20  | Give a cautious overall interpretation of results considering objectives, limitations, multiplicity of analyses, results from similar studies, and other relevant evidence                                   | 11-14 |
| Generalisability         | 21  | Discuss the generalisability (external validity) of the study results                                                                                                                                        | 11-14 |
| <b>Other information</b> |     |                                                                                                                                                                                                              |       |
| Funding                  | 22  | Give the source of funding and the role of the funders for the present study and, if applicable, for the original study on which the present article is based                                                | 16    |

\*Give information separately for cases and controls in case-control studies and, if applicable, for exposed and unexposed groups in cohort and cross-sectional studies.

**Note:** An Explanation and Elaboration article discusses each checklist item and gives methodological background and published examples of transparent reporting. The STROBE checklist is best used in conjunction with this article (freely available on the Web sites of PLoS Medicine at <http://www.plosmedicine.org/>, Annals of Internal Medicine at <http://www.annals.org/>, and Epidemiology at <http://www.epidem.com/>). Information on the STROBE Initiative is available at [www.strobe-statement.org](http://www.strobe-statement.org).
