# Supplementary material for: Parental knowledge, attitudes and beliefs on fever: a cross-sectional study in Ireland
Source: PubMed Central journal article supplement — BMJ Open. 2017 Jul 9;7(7):e015684. doi: 10.1136/bmjopen-2016-015684 (PMC5541503; doi:10.1136/bmjopen-2016-015684), 2017-07-09
Supplement: bmjopen-2016-015684supp001.pdf [file bmjopen-2016-015684supp001.pdf]

Supplemental Table 1. Websites and webpages used to host questionnaire

|                                             |
|---------------------------------------------|
| Eumom                                       |
| Mummy Pages                                 |
| Recession Busting Moms                      |
| Schooldays                                  |
| Fulltimemum                                 |
| HerFamily                                   |
| Magicmum                                    |
| Wonderbaba                                  |
| Fiona O'Farrell Nurturing Child Development |

Supplemental Table 2. Estimated associations between (ORs and 95% CIs) parental experience and key socio-demographic variables with parental knowledge.

|                                   | <i>Dependent variable:</i>                                       |                                                                 |
|-----------------------------------|------------------------------------------------------------------|-----------------------------------------------------------------|
|                                   | Knowledge of correct definition of fever temperature 38°C<br>(1) | Do you alternate between fever reducing medications (no)<br>(2) |
| Years of parenting experience     | 0.99 (0.98, 1.01)                                                | 1.01 (0.99, 1.03)                                               |
| Age (years)                       | 0.98 (0.94, 1.01)                                                | 1.05 (1.02, 1.10)                                               |
| Female (vs. male)                 | 0.88 (0.42, 1.76)                                                | 1.40 (0.64, 2.88)                                               |
| Any 3rd level education (vs none) | 0.69 (0.42, 1.12)                                                | 1.49 (0.92, 2.40)                                               |
| Has a partner (vs. none)          | 0.48 (0.20, 1.02)                                                | 0.94 (0.45, 1.88)                                               |
| Constant                          | 13.78 (2.77, 72.62)                                              | 0.20 (0.04, 1.04)                                               |
| Observations                      | 800                                                              | 792                                                             |
| Log Likelihood                    | -518.03                                                          | -466.30                                                         |
| Akaike Inf. Crit.                 | 1,048.05                                                         | 944.60                                                          |

Supplemental Table 3. Estimated associations between (ORs and 95% CIs) parental experience and key socio-demographic variables with parental knowledge.

|                                   | <i>Dependent variable:</i>                                               |                                                           |                                                                           |                                                                           |                                                            |
|-----------------------------------|--------------------------------------------------------------------------|-----------------------------------------------------------|---------------------------------------------------------------------------|---------------------------------------------------------------------------|------------------------------------------------------------|
|                                   | Every child with a fever needs fever reducing medications (false)<br>(1) | Every child with a fever needs antibiotics (false)<br>(2) | Antibiotics are used to treat infections caused by bacteria (true)<br>(3) | Antibiotics are used to treat infections caused by viruses (false)<br>(4) | In all cases of fever there is an infection (false)<br>(5) |
| Years of parenting experience     | 0.99 (0.98, 1.01)                                                        | 1.01 (0.99, 1.03)                                         | 0.97 (0.94, 1.01)                                                         | 1.02 (0.99, 1.06)                                                         | 1.01 (0.99, 1.03)                                          |
| Age (years)                       | 0.98 (0.94, 1.01)                                                        | 1.05 (1.02, 1.10)                                         | 1.08 (1.01, 1.16)                                                         | 0.94 (0.89, 0.99)                                                         | 1.03 (0.99, 1.07)                                          |
| Female (vs. male)                 | 0.88 (0.42, 1.76)                                                        | 1.40 (0.64, 2.88)                                         | 1.18 (0.19, 4.19)                                                         | 0.18 (0.08, 0.42)                                                         | 1.05 (0.52, 2.29)                                          |
| Any 3rd level education (vs none) | 0.69 (0.42, 1.12)                                                        | 1.49 (0.92, 2.40)                                         | 1.74 (0.73, 3.74)                                                         | 0.45 (0.24, 0.89)                                                         | 0.61 (0.39, 0.99)                                          |
| Has a partner (vs. none)          | 0.48 (0.20, 1.02)                                                        | 0.94 (0.45, 1.88)                                         | 0.72 (0.11, 2.52)                                                         | 0.60 (0.25, 1.65)                                                         | 0.77 (0.39, 1.58)                                          |
| Constant                          | 13.78 (2.77, 72.62)                                                      | 0.20 (0.04, 1.04)                                         | 1.00 (0.05, 27.60)                                                        | 11.26 (1.06, 117.08)                                                      | 0.24 (0.05, 1.23)                                          |
| Observations                      | 798                                                                      | 799                                                       | 799                                                                       | 798                                                                       | 799                                                        |
| Log Likelihood                    | -550.70                                                                  | -145.93                                                   | -172.06                                                                   | -229.36                                                                   | -474.98                                                    |
| Akaike Inf. Crit.                 | 1,113.39                                                                 | 303.86                                                    | 356.13                                                                    | 470.73                                                                    | 961.97                                                     |
